# Supplementary material for: From Wild Halophyte to Future Crop: Genomic Insights into Salicornia
Source: Research Square preprint supplement (doi:10.21203/rs.3.rs-7061928/v1), 2025-07-11
Supplement: Supplementary file 1 [file 3e0123ef6119be7ca3156092.pdf]

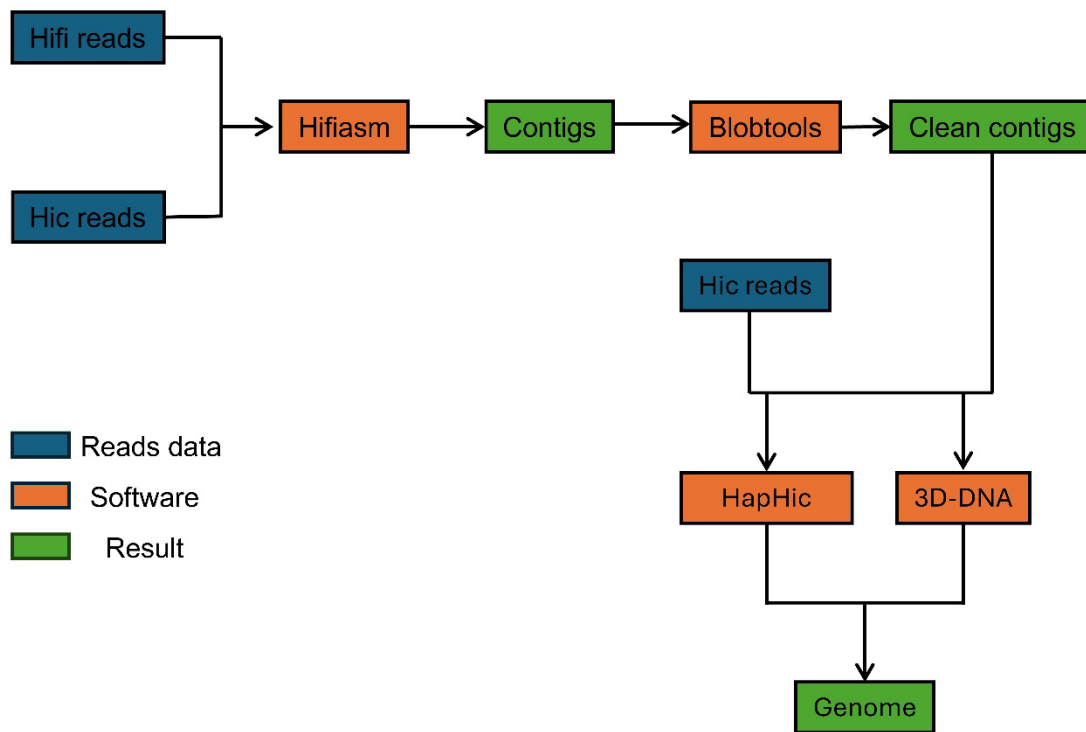

**Extended Data Fig. 1.** The genome assembly pipeline used in this study.

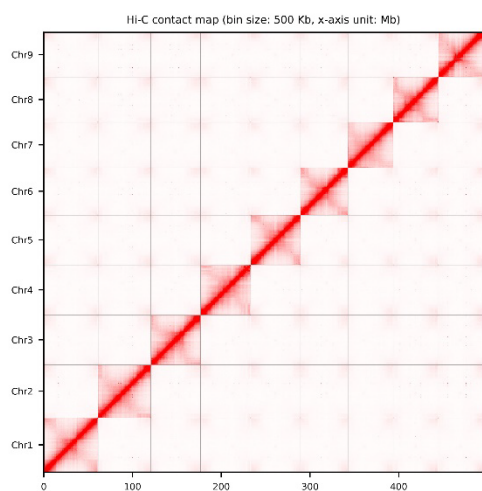

*S. brachiata*

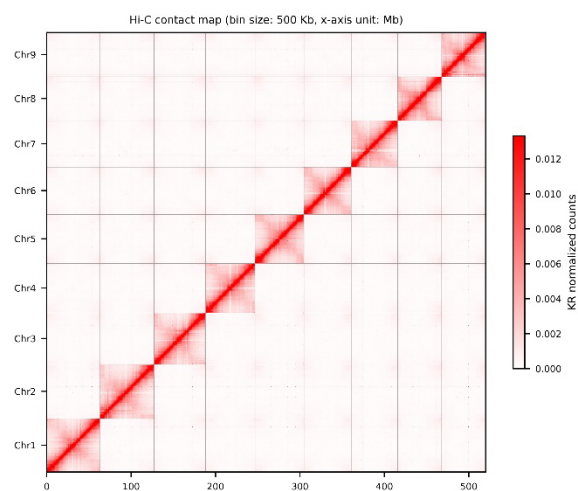

*S. sinus-persica*

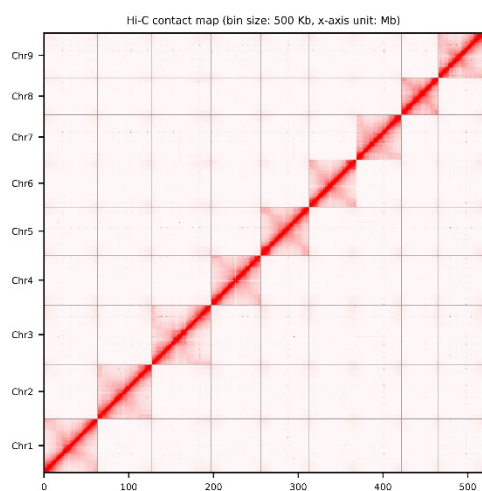

*S. persica ssp. iranica*

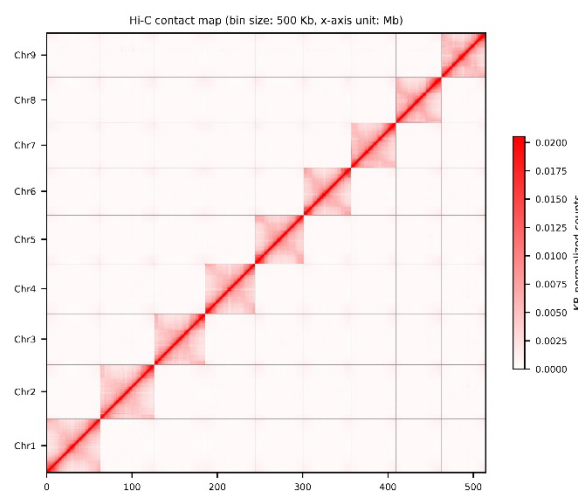

*S. europaea* (Israel)

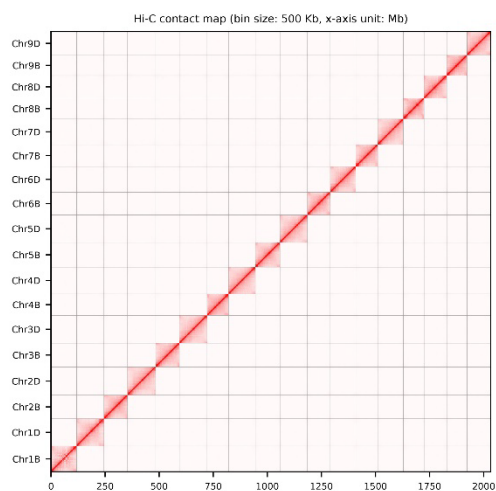

*S. bigelovii*

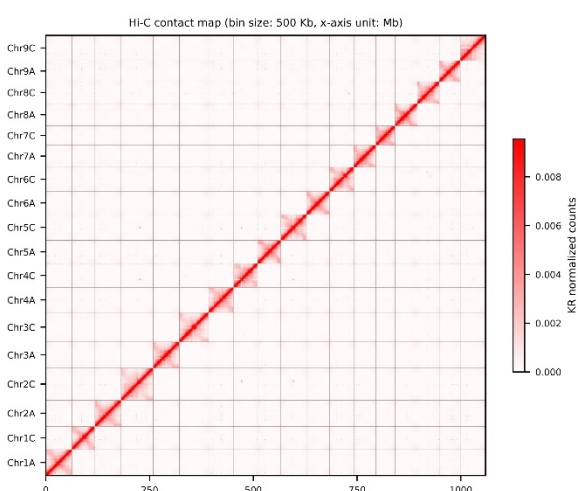

*S. europaea* (France)

**Extended Data Fig. 2.** The Omni-C heatmap of six pseudo chromosome-scale assembled genomes of *Salicornia*.

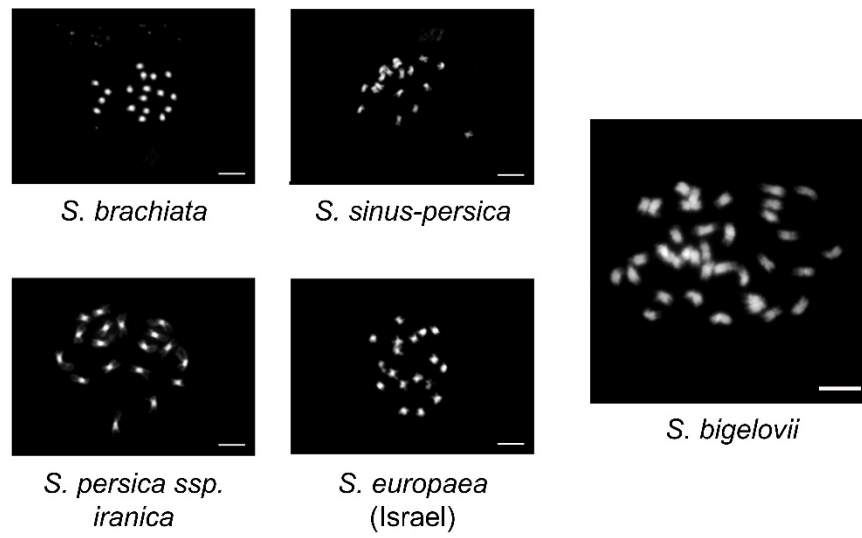

**Extended Data Fig. 3.** Chromosome counts on metaphase chromosomes in *S. brachiata*, *S. sinus-persica*, *S. europaea* (Israel) and *S. persica ssp. iranica*, and *S. bigelovii*. Chromosomes were stained with DAPI. Scale bars, 5  $\mu$ m.

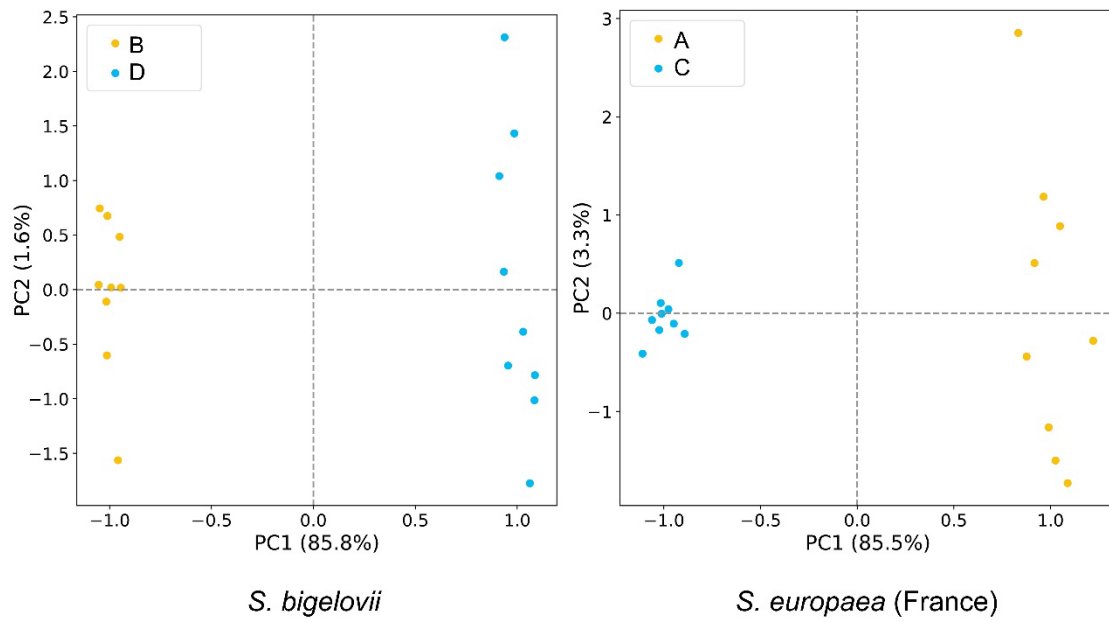

**Extended Data Fig. 4.** Principal component analysis of differential *k-mers*. Points indicate chromosomes of the subgenome represented by colors.

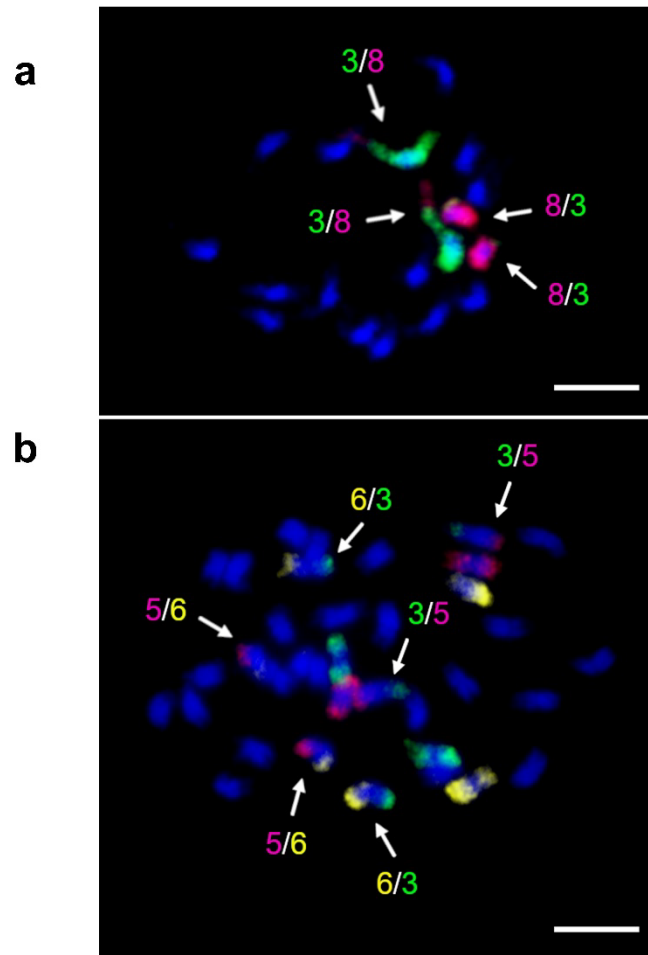

**Extended Data Fig. 5.** Reciprocal translocations revealed by oligo-FISH on mitotic metaphase chromosomes of *Salicornia* species. a: Reciprocal translocation between chromosomes three and eight in *S. persica ssp. iranica*. Oligo-FISH probes SEUR3 (green) and SEUR8 (pink); b: Reciprocal translocations between chromosomes three and five, chromosomes five and six, and chromosomes six and three in *S. bigelovii*. Oligo-painting probes SEUR3 (green), SEUR5 (pink) and SEUR6 (yellow). Translocated chromosomes are indicated by white arrows. Chromosomes were stained with DAPI (blue). Scale bars, 5  $\mu$ m.



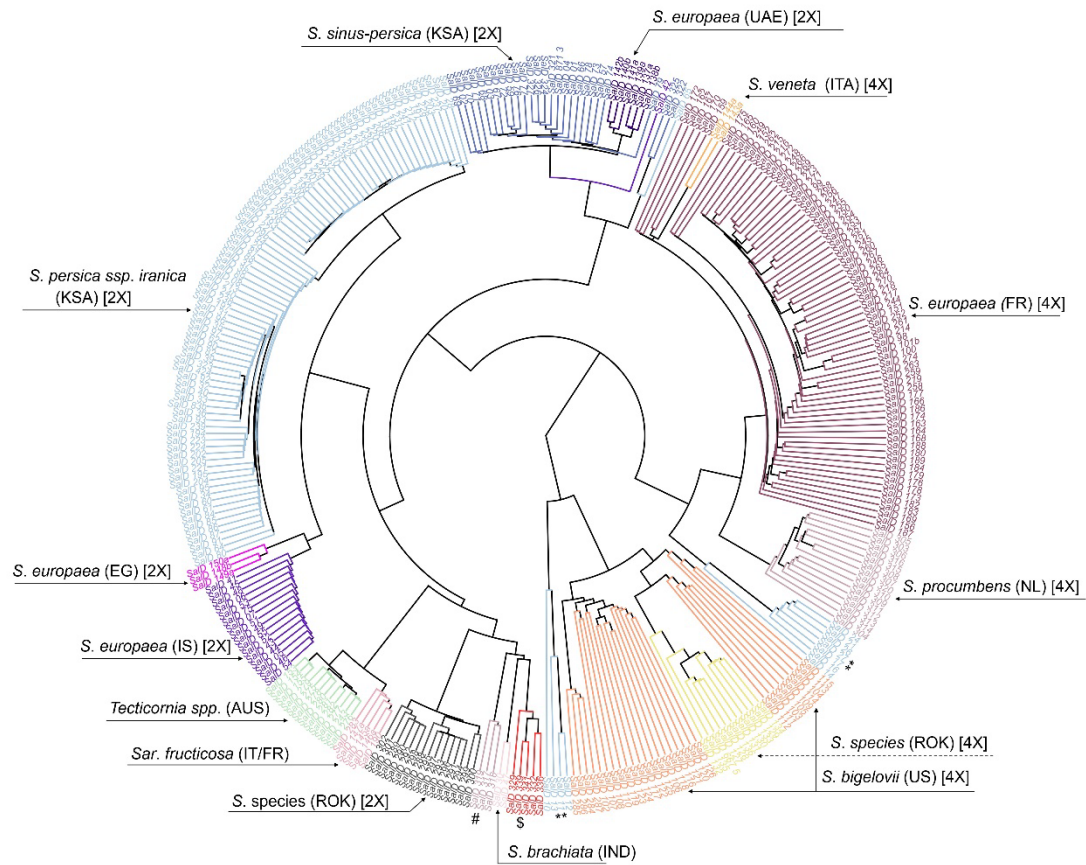

**Extended Data Fig. 7.** Unrooted Neighbor-joining (NJ) tree of *Salicornia* and related species based on *k-mer* analysis. Branch tips are labeled with the corresponding SalD\_# accession identifiers. Distinct clades and subclades are highlighted and annotated according to species. Accessions marked with ( ) represent putative *S. persica iranica* that were genetically distinct from the rest of the group. Accessions labeled with # represent putative diploid *S. europaea* or *S. procumbens* from the Netherlands, while those marked with (\$) represent putative *S. europaea* from China. 'Sar.' refers to the genus *Sarcocornia*.



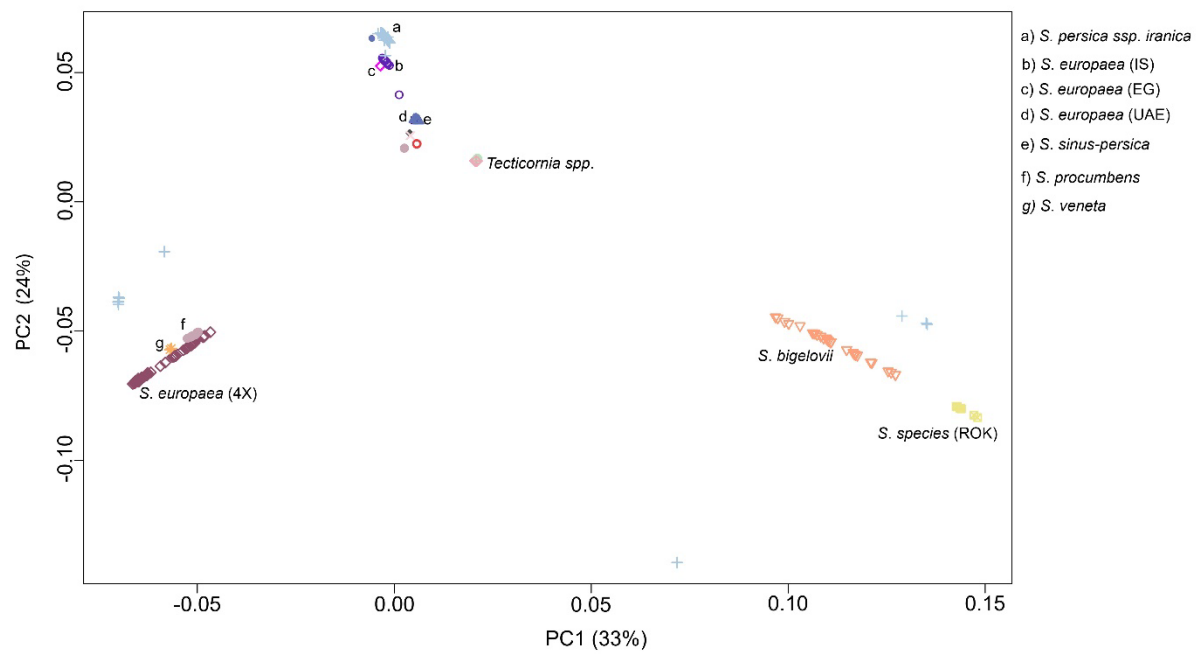

**Extended Data Fig. 8.** Principal component analysis (PCA) of *Salicornia* species based on *k-mer* data, showing the first two principal components (PC1 and PC2). Individual accessions are represented by colored shapes grouped according to species designation and genome composition.

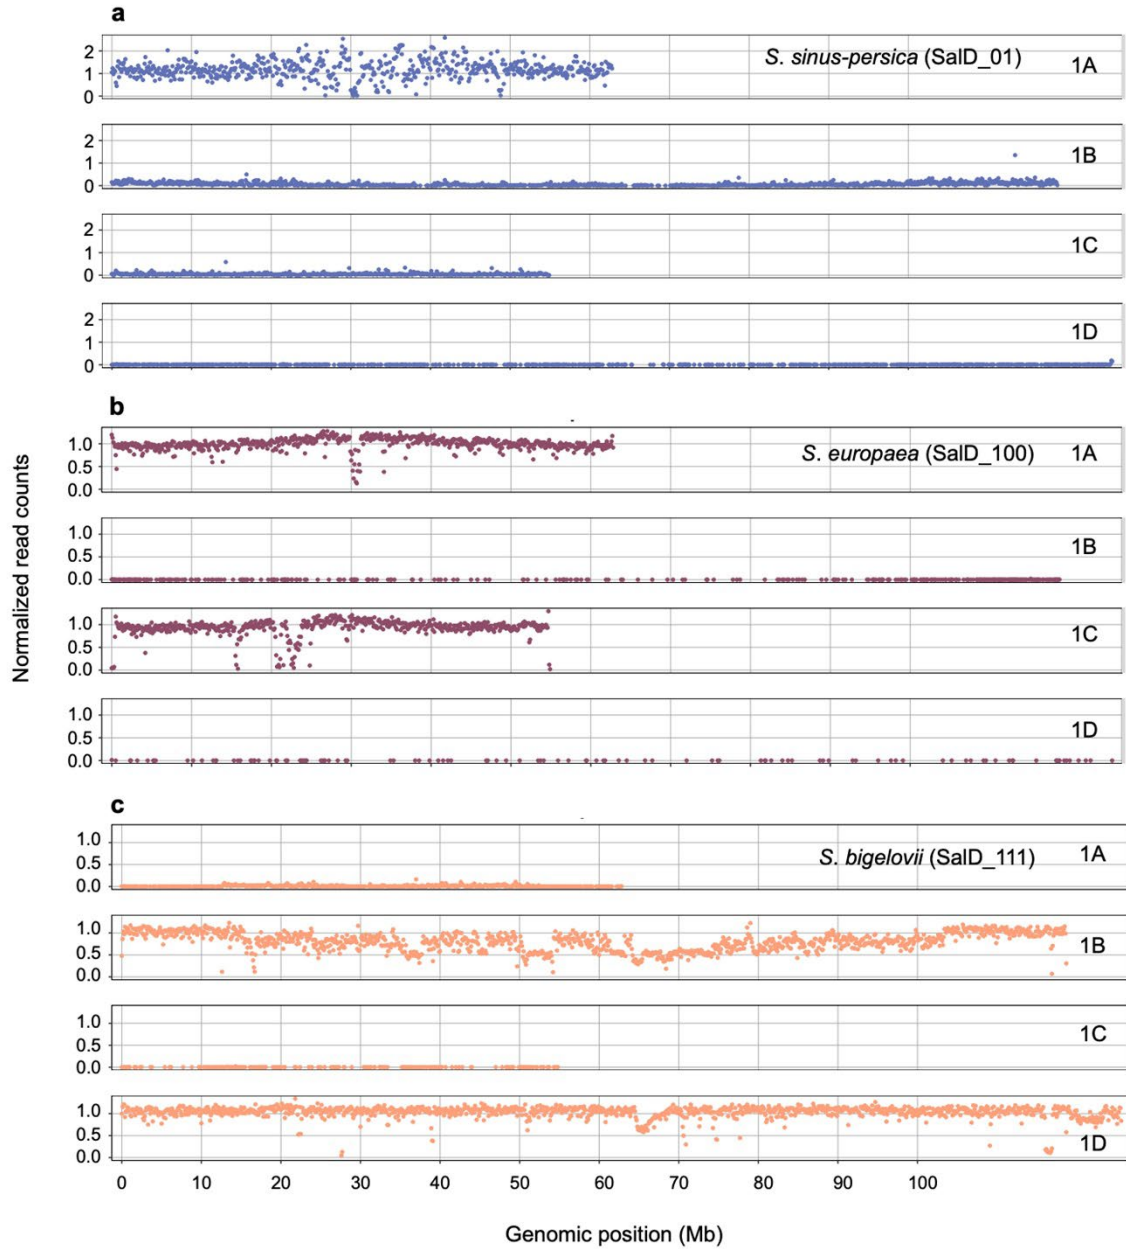

**Extended Data Fig. 9.** Normalized read counts of different *Salicornia* species mapped to a combined reference genome of two tetraploids, *S. europaea* and *S. bigelovii*, showing chromosome 1 of different subgenomes. Normalized read count of 1 indicates two normal copies of the chromosome; 0.5 indicates a single copy; and 0 indicates a nullisomic condition. a: SalD-01, a diploid *S. sinus-persica* from KSA. b: SalD\_100, a tetraploid *S. europaea* from France. c: SalD\_111, a tetraploid *S. bigelovii* from the USA.

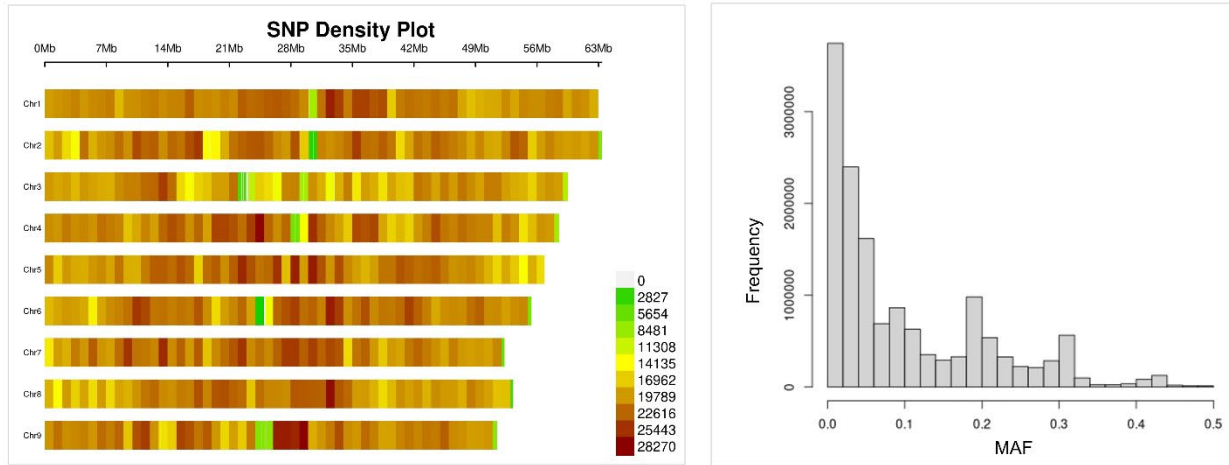

**Extended Data Fig. 10.** The genome-wide distribution of SNPs among diploid *Salicornia* species, measured using 1 Mb bins (left panel), and the distribution of minor allele frequency (MAF) across the same diploid species (right panel).
