# Supplementary material for: From Wild Halophyte to Future Crop: Genomic Insights into Salicornia
Source: Research Square preprint supplement (doi:10.21203/rs.3.rs-7061928/v1), 2025-07-11
Supplement: Supplementary file 1 [file a35d584626b7c54d4360893e.xlsx]

## Sheet: Supplementary Table 1
Supplementary Table 1. Information of Omni-C and HiFi sequencing
Species	Total number of Omni-C bases	Depth of Omni-C bases	Total number of HiFi bases	Depth of HiFi bases
S. bigelovii	58619560800	28X	59083167995	28X
S. europaea (France)	91860302400	78X	51926572810	44X
S. europaea (Israel)	60172820100	116X	17950298972	34X
S. persica ssp. iranica	40667157300	72X	80163298693	143X
S. sinus-persica	59667989400	104X	80013892812	140X
S. brachiata	78850727100	145X	26837871621	49X

## Sheet:  Supplementary Table 2
Supplementary Table 2. Assembly and evaluation of six Salicornia genomes
Species	Mapping rate of short reads (%)	Scaffold N50 (bp)	Scaffold N90 (bp)	unplaced contigs length (bp)
S. bigelovii	99.88	113138572	98786103	11292989
S. europaea (France)	98.85	58682116	52569409	116814903
S. europaea (Israel)	97.32	56823638	51428091	5028763
S. persica ssp. iranica	99.88	56944142	43511563	43511563
S. sinus-persica	99.86	57506789	51937722	52524220
S. brachiata	99.72	55846030	49949492	48130604

## Sheet: Supplementary Table 3
Supplementary Table 3. BUSCO of six Salicornia genomes gene prediction
Species	BUSCO scores
S. bigelovii	0.99
S. europaea (France)	0.981
S. europaea (Israel)	0.988
S. persica ssp. iranica	0.976
S. sinus-persica	0.97
S. brachiata	0.96

## Sheet: Supplementary Table 4
Supplementary Table 4. LTR content from diploid genomes and tetraploid subgenomes analysed using EDTA.
	Copia	Gypsy	LTR unknown
S. sinus-persica	0.0772	0.1781	0.0803
S. brachiata	0.0753	0.2022	0.0644
S. persica ssp. iranica	0.0706	0.201	0.0751
S. europaea (Israel)	0.0781	0.2054	0.0836
S. europaea (France)	0.0725	0.3947	0.1022
S. bigelovii	0.0836	0.4159	0.1233
S. europaea (France)_C	0.0826	0.2558	0.0903
S. europaea (France)_A	0.0855	0.2064	0.1085
S. bigelovii_B	0.0845	0.3972	0.1017
S. bigelovii_D	0.0734	0.4375	0.1056

## Sheet: Supplementary Table 5
Supplementary Table 5.Genome wide mean pairwise Fst (Weir and Cockerham's Fst)
Species	S. europaea, 2X (UAE)	S. europaea, 2X (Israel)	S. persica ssp. iranica
S. sinus-persica	0.2	0.78	0.8
S. europaea, 2X (UAE)	-	0.84	0.89
S. europaea, 2X (Israel)	0.84	-	0.59
S. persica ssp. iranica	0.89	0.59	-

## Sheet: Supplementary Table 6
Supplementary Table 6. Summary of collected accessions
WGS identifier	Species	Ploidy	Genome size [Mbp]	Collected from wild	Location	Origin country	Origin region	Closest City	Min T at location, ºC	Min average T at location, ºC	Max T at location, ºC	Max average T at location, ºC	Collection origin GPS latitude	Collection origin GPS longitude	Soil pH at location	Soil EC at location (ds.m-1)	Na in soil (ppt)	Water pH at location	Water EC at location (ds.m-1)	Na in water (ppt)	Selfed seed packet ID	Plant ID	Pedigree	Relationship with Mother plant	Reference for soil and water data where samples were not available
SalD_01	Salicornia sinus-persica (KSA)	2x	NA	Yes	Tarout Island	Kingdom of Saudi Arabia	Tarout Island	Tarout	11	18	43	33	26.5913	50.0465	8.7	9.2	14.9	8.1	50	14.9	-	1006-4	KAUST242
SalD_02	Salicornia sinus-persica (KSA)	2x	NA	Yes	Tarout Island	Kingdom of Saudi Arabia	Tarout Island	Tarout	11	18	43	33	26.5913	50.0465	8.7	9.2	14.9	8.1	50	14.9	KAUST1813	1007-2	KAUST1007
SalD_03	Salicornia sinus-persica (KSA)	2x	NA	Yes	Tarout Island	Kingdom of Saudi Arabia	Tarout Island	Tarout	11	18	43	33	26.5913	50.0465	8.7	9.2	14.9	8.1	50	14.9	KAUST1832	1014-4	KAUST1014
SalD_04	Salicornia sinus-persica (KSA)	2x	NA	Yes	Tarout Island	Kingdom of Saudi Arabia	Tarout Island	Tarout	11	18	43	33	26.5913	50.0465	8.7	9.2	14.9	8.1	50	14.9	KAUST1839	1018-2	KAUST1018
SalD_05	Salicornia europaea (IS)	2x	NA	No	Jacob Blaustein Institute for Desert Research (BIDR)	Israel	Dead Sea region	Neve Zohar	10	16	38	26	30.9723	35.3619	7.5	N/A	4.6	6	160	27.9	-	1041-5	KAUST3		https://doi.org/10.1016/S0723-2020(11)80402-9
SalD_06	Salicornia europaea (IS)	2x	NA	No	Jacob Blaustein Institute for Desert Research (BIDR)	Israel	Dead Sea region	Neve Zohar	10	16	38	26	30.9723	35.3619	7.5	N/A	4.6	6	160	27.9	KAUST1847	1042-1	KAUST1042		https://doi.org/10.1016/S0723-2020(11)80402-9
SalD_07	Salicornia europaea (IS)	2x	NA	No	Jacob Blaustein Institute for Desert Research (BIDR)	Israel	Dead Sea region	Neve Zohar	10	16	38	26	30.9723	35.3619	7.5	N/A	4.6	6	160	27.9	KAUST1856	1043-2	KAUST1043		https://doi.org/10.1016/S0723-2020(11)80402-9
SalD_08	Salicornia persica ssp. iranica (KSA)	2x	NA	Yes	QL-2	Kingdom of Saudi Arabia	Qassim, Qassim-Aushazia lake	Al Mithnab	18	19	45	34	25.9537	44.2017	8.7	10.8	8.9	8.1	55.5	12	KAUST1862	1130-1	KAUST1130
SalD_09b	Salicornia persica ssp. iranica (KSA)	2x	NA	Yes	QL-1	Kingdom of Saudi Arabia	Qassim, Qassim-Aushazia lake	Al Mithnab	18	19	45	34	25.9886	44.1798	8.7	10.8	8.8	8.1	55.5	12	KAUST1870	1133-1	KAUST1133
SalD_10	Salicornia persica ssp. iranica (KSA)	2x	NA	Yes	QL-1	Kingdom of Saudi Arabia	Qassim, Qassim-Aushazia lake	Al Mithnab	18	19	45	34	25.9886	44.1798	8.7	10.8	8.8	8.1	55.5	12	KAUST1880	1134-3	KAUST1134
SalD_100	Salicornia europaea (FR)	4x	1129	Yes	Etang de Thau	France	Etang de Thau	Marseillan	-7	5	32	31	43.3305	3.54487	8.7	23.9	N/A	7.64	63	N/A	-	924-4	KAUST426	Offspring
SalD_101b	Salicornia europaea (FR)	4x	1129	Yes	Etang de Thau	France	Etang de Thau	Marseillan	-7	5	32	31	43.3305	3.54487	8.7	23.9	N/A	7.64	63	N/A	KAUST1777	925-1	KAUST426	Offspring
SalD_102	Salicornia bigelovii (US)	4x	NA	Yes	Florida	USA	Everglades National Park	Miami	16	20	31	28	25.2427	-80.4817	7.19	1.8	N/A	8	16	N/A	-	131-8	Wild		https://doi.org/10.1016/j.pce.2019.01.004
SalD_103	Salicornia bigelovii (US)	4x	NA	Yes	Florida	USA	Everglades National Park	Miami	16	20	31	28	25.2427	-80.4817	7.19	1.8	N/A	8	16	N/A	-	2-1	Wild	Sibling	https://doi.org/10.1016/j.pce.2019.01.004
SalD_104	Salicornia bigelovii (US)	4x	2138	Yes	Florida	USA	Everglades National Park	Miami	16	20	31	28	25.2427	-80.4817	7.19	1.8	N/A	8	16	N/A	KAUST1313	25-5	KAUST25		https://doi.org/10.1016/j.pce.2019.01.004
SalD_105	Salicornia bigelovii (US)	4x	NA	Yes	Florida	USA	Everglades National Park	Miami	16	20	31	28	25.2427	-80.4817	7.19	1.8	N/A	8	16	N/A	-	277-1	KAUST277		https://doi.org/10.1016/j.pce.2019.01.004
SalD_106	Salicornia bigelovii (US)	4x	NA	Yes	Florida	USA	Everglades National Park	Miami	16	20	31	28	25.2427	-80.4817	7.19	1.8	N/A	8	16	N/A	KAUST1317	28-7	KAUST28		https://doi.org/10.1016/j.pce.2019.01.004
SalD_107	Salicornia bigelovii (US)	4x	NA	Yes	Florida	USA	Everglades National Park	Miami	16	20	31	28	25.2427	-80.4817	7.19	1.8	N/A	8	16	N/A	KAUST1367	281-7	KAUST281		https://doi.org/10.1016/j.pce.2019.01.004
SalD_108	Salicornia bigelovii (US)	4x	NA	Yes	Florida	USA	Everglades National Park	Miami	16	20	31	28	25.2427	-80.4817	7.19	1.8	N/A	8	16	N/A	KAUST1369	427-7	KAUST427		https://doi.org/10.1016/j.pce.2019.01.004
SalD_109	Salicornia bigelovii (US)	4x	2138	Yes	Florida	USA	Everglades National Park	Miami	16	20	31	28	25.2427	-80.4817	7.19	1.8	N/A	8	16	N/A	KAUST1384	430-7	KAUST430	Offspring	https://doi.org/10.1016/j.pce.2019.01.004
SalD_11	Salicornia persica ssp. iranica (KSA)	2x	NA	Yes	QL-1	Kingdom of Saudi Arabia	Qassim, Qassim-Aushazia lake	Al Mithnab	18	19	45	34	25.9886	44.1798	8.7	10.8	8.8	8.1	55.5	12 ppt	KAUST1888	1135-5	KAUST1135
SalD_110	Salicornia bigelovii (US)	4x	NA	Yes	Florida	USA	Everglades National Park	Miami	16	20	31	28	25.2427	-80.4817	7.19	1.8	N/A	8	16	N/A	KAUST1390	431-7	KAUST431		https://doi.org/10.1016/j.pce.2019.01.004
SalD_111	Salicornia bigelovii (US)	4x	NA	Yes	Florida	USA	Everglades National Park	Miami	16	20	31	28	25.2427	-80.4817	7.19	1.8	N/A	8	16	N/A	KAUST1394	433-2	KAUST433		https://doi.org/10.1016/j.pce.2019.01.004
SalD_112	Salicornia bigelovii (US)	4x	NA	Yes	Florida	USA	Everglades National Park	Miami	16	20	31	28	25.2427	-80.4817	7.19	1.8	N/A	8	16	N/A	KAUST1275	434-7	KAUST434		https://doi.org/10.1016/j.pce.2019.01.004
SalD_113	Salicornia bigelovii (US)	4x	2138	Yes	Florida	USA	Everglades National Park	Miami	16	20	31	28	25.2427	-80.4817	7.19	1.8	N/A	8	16	N/A	-	498-7	KAUST25		https://doi.org/10.1016/j.pce.2019.01.004
SalD_114	Salicornia bigelovii (US)	4x	NA	Yes	Florida	USA	Everglades National Park	Miami	16	20	31	28	25.2427	-80.4817	7.19	1.8	N/A	8	16	N/A	KAUST1426	506-7	KAUST506		https://doi.org/10.1016/j.pce.2019.01.004
SalD_115	Salicornia bigelovii (US)	4x	2138	Yes	Florida	USA	Everglades National Park	Miami	16	20	31	28	25.2427	-80.4817	7.19	1.8	N/A	8	16	N/A	-	530-1	KAUST25		https://doi.org/10.1016/j.pce.2019.01.004
SalD_116	Salicornia bigelovii (US)	4x	NA	Yes	Florida	USA	Everglades National Park	Miami	16	20	31	28	25.2427	-80.4817	7.19	1.8	N/A	8	16	N/A	KAUST1431	535-3	KAUST535		https://doi.org/10.1016/j.pce.2019.01.004
SalD_117	Salicornia bigelovii (US)	4x	NA	Yes	Florida	USA	Everglades National Park	Miami	16	20	31	28	25.2427	-80.4817	7.19	1.8	N/A	8	16	N/A	KAUST1439	537-7	KAUST537		https://doi.org/10.1016/j.pce.2019.01.004
SalD_118	Salicornia bigelovii (US)	4x	NA	Yes	Florida	USA	Everglades National Park	Miami	16	20	31	28	25.2427	-80.4817	7.19	1.8	N/A	8	16	N/A	KAUST1442	542-5	KAUST542		https://doi.org/10.1016/j.pce.2019.01.004
SalD_119	Salicornia bigelovii (US)	4x	NA	Yes	Florida	USA	Everglades National Park	Miami	16	20	31	28	25.2427	-80.4817	7.19	1.8	N/A	8	16	N/A	KAUST1446	545-1	KAUST545		https://doi.org/10.1016/j.pce.2019.01.004
SalD_12	Salicornia persica ssp. iranica (KSA)	2x	NA	Yes		Kingdom of Saudi Arabia	Qassim, Qassim-Aushazia lake	Al Mithnab	18	19	45	34	25.9886	44.1798	8.7	10.8	8.8	8.1	55.5	12	KAUST1890	1136-1	KAUST1136
SalD_120	Salicornia bigelovii (US)	4x	NA	Yes	Florida	USA	Everglades National Park	Miami	16	20	31	28	25.2427	-80.4817	7.19	1.8	N/A	8	16	N/A	KAUST1457	561-4	KAUST561		https://doi.org/10.1016/j.pce.2019.01.004
SalD_121	Salicornia bigelovii (US)	4x	NA	Yes	Florida	USA	Everglades National Park	Miami	16	20	31	28	25.2427	-80.4817	7.19	1.8	N/A	8	16	N/A	KAUST1463	565-4	KAUST565		https://doi.org/10.1016/j.pce.2019.01.004
SalD_122	Salicornia bigelovii (US)	4x	NA	Yes	Florida	USA	Everglades National Park	Miami	16	20	31	28	25.2427	-80.4817	7.19	1.8	N/A	8	16	N/A	KAUST1473	575-5	KAUST575		https://doi.org/10.1016/j.pce.2019.01.004
SalD_123	Salicornia bigelovii (US)	4x	NA	Yes	Florida	USA	Everglades National Park	Miami	16	20	31	28	25.2427	-80.4817	7.19	1.8	N/A	8	16	N/A	KAUST1484	576-8	KAUST576		https://doi.org/10.1016/j.pce.2019.01.004
SalD_124	Salicornia bigelovii (US)	4x	NA	Yes	Florida	USA	Everglades National Park	Miami	16	20	31	28	25.2427	-80.4817	7.19	1.8	N/A	8	16	N/A	KAUST1486	580-7	KAUST580		https://doi.org/10.1016/j.pce.2019.01.004
SalD_125	Salicornia bigelovii (US)	4x	NA	Yes	Florida	USA	Everglades National Park	Miami	16	20	31	28	25.2427	-80.4817	7.19	1.8	N/A	8	16	N/A	KAUST1490	581-1	KAUST581		https://doi.org/10.1016/j.pce.2019.01.004
SalD_126	Salicornia bigelovii (US)	4x	NA	Yes	Florida	USA	Everglades National Park	Miami	16	20	31	28	25.2427	-80.4817	7.19	1.8	N/A	8	16	N/A	KAUST1497	587-3	KAUST587		https://doi.org/10.1016/j.pce.2019.01.004
SalD_127	Salicornia species (ROK)	4x	2357	Yes	Jeollanam-do	Republic of Korea	Jeollanam-do	Jido		-9		29	35.0414	126.187	6.9	10.1	N/A	7.6	41.8	N/A	KAUST1506	667-9	KAUST8
SalD_128	Salicornia species (ROK)	4x	2357	Yes	Jeollanam-do	Republic of Korea	Jeollanam-do	Jido		-9		29	35.0414	126.187	6.9	10.1	N/A	7.6	41.8	N/A	KAUST1508	672-2	KAUST672
SalD_129	Salicornia species (ROK)	4x	NA	Yes	Jeollanam-do	Republic of Korea	Jeollanam-do	Jido		-9		29	35.0414	126.187	6.9	10.1	N/A	7.6	41.8	N/A	KAUST1517	683-8	KAUST683
SalD_13	Salicornia persica ssp. iranica (KSA)	2x	NA	Yes	Tarout Island	Kingdom of Saudi Arabia	Qassim, Qassim-Aushazia lake	Al Mithnab	18	19	45	34	25.9886	44.1798	8.7	10.8	8.8	8.1	55.5	12	KAUST1900	1138-3	KAUST173
SalD_130	Salicornia species (ROK)	4x	NA	Yes	Jeollanam-do	Republic of Korea	Jeollanam-do	Jido		-9		29	35.0414	126.187	6.9	10.1	N/A	7.6	41.8	N/A	KAUST1525	712-7	KAUST712
SalD_131	Salicornia species (ROK)	4x	NA	Yes	Jeollanam-do	Republic of Korea	Jeollanam-do	Jido		-9		29	35.0414	126.187	6.9	10.1	N/A	7.6	41.8	N/A	KAUST1533	713-9	KAUST713
SalD_132	Salicornia species (ROK)	4x	NA	Yes	Jeollanam-do	Republic of Korea	Jeollanam-do	Jido		-9		29	35.0414	126.187	6.9	10.1	N/A	7.6	41.8	N/A	KAUST1544	717-8	KAUST717
SalD_133	Salicornia species (ROK)	4x	NA	Yes	Jeollanam-do	Republic of Korea	Jeollanam-do	Jido		-9		29	35.0414	126.187	6.9	10.1	N/A	7.6	41.8	N/A	KAUST1283	723-7	KAUST723
SalD_134	Salicornia species (ROK)	4x	NA	Yes	Jeollanam-do	Republic of Korea	Jeollanam-do	Jido		-9		29	35.0414	126.187	6.9	10.1	N/A	7.6	41.8	N/A	KAUST1507	725-1	KAUST8
SalD_135	Salicornia species (ROK)	4x	NA	Yes	Jeollanam-do	Republic of Korea	Jeollanam-do	Jido		-9		29	35.0414	126.187	6.9	10.1	N/A	7.6	41.8	N/A	KAUST1286	729-3	KAUST729
SalD_136	Salicornia species (ROK)	4x	2357	Yes	Jeollanam-do	Republic of Korea	Jeollanam-do	Jido		-9		29	35.0414	126.187	6.9	10.1	N/A	7.6	41.8	N/A	KAUST1311	8-7	KAUST8
SalD_137a	Salicornia europaea (UAQ)	2x	582	Yes	Umm al-Quwain	United Arab Emirates	Umm al-Quwain	Al Salamah	13	17	44	40	25.5301	55.5889	8.2	73.2	N/A	7.59	65.6	N/A	KAUST1976	890-1-A	Unknown
SalD_138b	Salicornia europaea (UAQ)	2x	582	Yes	Umm al-Quwain	United Arab Emirates	Umm al-Quwain	Al Salamah	13	17	44	40	25.5301	55.5889	8.2	73.2	N/A	7.59	65.6	N/A	KAUST1977	890-3-A	Unknown
SalD_139a	Salicornia europaea (UAQ)	2x	582	Yes	Umm al-Quwain	United Arab Emirates	Umm al-Quwain	Al Salamah	13	17	44	40	25.5301	55.5889	8.2	73.2	N/A	7.59	65.6	N/A	KAUST1978	890-4-A	Unknown
SalD_14	Salicornia persica ssp. iranica (KSA)	2x	580	Yes	Tarout Island	Kingdom of Saudi Arabia	Qassim, Qassim-Aushazia lake	Al Mithnab	18	19	45	34	25.9886	44.1798	8.7	10.8	8.8	8.1	55.5	12	KAUST1901	1139-1	KAUST1139
SalD_140b	Salicornia europaea (RAK)	2x	579	Yes	Ras al-Khaimah	United Arab Emirates	Ras al-Khaimah	Ras al-Khaimah		12		44	25.8844	56.0127	7.81	51.6	N/A	7.74	57.8	N/A	KAUST2002	891-1-A	Unknown
SalD_141a	Salicornia europaea (RAK)	2x	579	Yes	Ras al-Khaimah	United Arab Emirates	Ras al-Khaimah	Ras al-Khaimah		12		44	25.8844	56.0127	7.81	51.6	N/A	7.74	57.8	N/A	KAUST2003	891-2-A	Unknown
SalD_142b	Salicornia europaea (RAK)	2x	579	Yes	Ras al-Khaimah	United Arab Emirates	Ras al-Khaimah	Ras al-Khaimah		12		44	25.8844	56.0127	7.81	51.6	N/A	7.74	57.8	N/A	KAUST1979	891-3-A	Unknown
SalD_143a	Salicornia veneta (IT)	4x	1164	Yes	Venetian Lagoon	Italy	Venetian Lagoon	Chioggia	9	13	29	18	45.2591	12.191	8.5	3.87	N/A	N/A	N/A	29.2	-	930-2-A	Wild
SalD_144a	Salicornia veneta (IT)	4x	1164	Yes	Venetian Lagoon	Italy	Venetian Lagoon	Chioggia	9	13	29	18	45.2591	12.191	8.5	3.87	N/A	N/A	N/A	29.2	KAUST1952	930-5-A	KAUST930
SalD_145a	Sarcocornia fructicosa (IT)	4x	3481	Yes	Venetian Lagoon	Italy	Venetian Lagoon	Chioggia	9	13	29	18	45.2494	12.2243	8.66	4.47	N/A	N/A	N/A	29.2	KAUST931	931-1-A	Wild
SalD_146a	Sarcocornia fructicosa (IT)	4x	3481	Yes	Venetian Lagoon	Italy	Venetian Lagoon	Chioggia	9	13	29	18	45.2494	12.2243	8.66	4.47	N/A	N/A	N/A	29.2	KAUST931	931-3-A	Wild
SalD_147a	Sarcocornia fructicosa (IT)	4x	3481	Yes	Venetian Lagoon	Italy	Venetian Lagoon	Chioggia	9	13	29	18	45.2494	12.2243	8.66	4.47	N/A	N/A	N/A	29.2	KAUST931	931-4-A	Wild
SalD_148b	Salicornia europaea (EG)	2x	NA	Yes	Rosetta	Egypt	Rosetta	Rasheed		11		32	31.4407	30.5401	9.08	1.317	2.5	7.9	35.75	15	KAUST1953	1-B	Wild
SalD_149a	Salicornia europaea (EG)	2x	569	Yes	Rosetta	Egypt	Rosetta	Rasheed		11		32	31.4407	30.5401	9.08	1.317	2.5	7.9	35.75	15	KAUST1301	2-A	Wild
SalD_150a	Salicornia europaea (EG)	2x	569	Yes	Rosetta	Egypt	Rosetta	Rasheed		11		32	31.4407	30.5401	9.08	1.317	2.5	7.9	35.75	15	KAUST1954	5-A	Wild
SalD_151	Salicornia europaea (FR)	4x	NA	Yes	Etang de Thau	France	Etang de Thau	Marseillan	-7	5	32	31	43.3305	3.54487	8.7	23.9	N/A	7.64	63	N/A	KAUST1980	1222-1	KAUST775
SalD_152	Salicornia europaea (FR)	4x	NA	Yes	Etang de Thau	France	Etang de Thau	Marseillan	-7	5	32	31	43.3305	3.54487	8.7	23.9	N/A	7.64	63	N/A	KAUST2006	1224-2	KAUST831
SalD_153	Sarcocornia unknown (FR)	4x	2048	Yes	Gruissan	France		Gruissan	12	13	29	20	43.0886	3.07996	9.05	16.06	7	8.24	158.6	13	-	KAUST4-2	Wild
SalD_154	Sarcocornia unknown (FR)	4x	2048	Yes	Gruissan	France		Gruissan	12	13	29	20	43.0886	3.07996	9.05	16.06	7	8.24	158.6	13	-	KAUST5-1	Wild
SalD_155	Sarcocornia unknown (FR)	4x	2048	Yes	Gruissan	France		Gruissan	12	13	29	20	43.0886	3.07996	9.05	16.06	7	8.24	158.6	13	-	KAUST6-1	Wild
SalD_156	Salicornia europaea (FR)	4x	NA	Yes	Etang de Thau	France	Etang de Thau	Marseillan	-7	5	32	31	43.3305	3.54487	8.7	23.9	N/A	7.64	63	N/A	KAUST1956	762-2	Wild
SalD_159	Salicornia europaea (FR)	4x	NA	Yes	Etang de Thau	France	Etang de Thau	Marseillan	-7	5	32	31	43.3305	3.54487	8.7	23.9	N/A	7.64	63	N/A	KAUST1984	765-1	Wild
SalD_16	Salicornia persica ssp. iranica (KSA)	2x	NA	Yes	Tarout Island	Kingdom of Saudi Arabia	Qassim, Qassim-Aushazia lake	Al Mithnab	18	19	45	34	25.9886	44.1798	8.7	10.8	8.8	8.1	55.5	12	KAUST1920	1141-3	KAUST1141
SalD_160	Salicornia europaea (FR)	4x	NA	Yes	Etang de Thau	France	Etang de Thau	Marseillan	-7	5	32	31	43.3305	3.54487	8.7	23.9	N/A	7.64	63	N/A	KAUST1985	766-1	Wild
SalD_162	Salicornia europaea (FR)	4x	NA	Yes	Etang de Thau	France	Etang de Thau	Marseillan	-7	5	32	31	43.3305	3.54487	8.7	23.9	N/A	7.64	63	N/A	KAUST1987	768-1	Wild
SalD_163	Salicornia europaea (FR)	4x	NA	Yes	Etang de Thau	France	Etang de Thau	Marseillan	-7	5	32	31	43.3305	3.54487	8.7	23.9	N/A	7.64	63	N/A	KAUST1958	772-1	Wild
SalD_164	Salicornia europaea (FR)	4x	NA	Yes	Etang de Thau	France	Etang de Thau	Marseillan	-7	5	32	31	43.3305	3.54487	8.7	23.9	N/A	7.64	63	N/A	KAUST1988	776-1	Wild
SalD_165	Salicornia europaea (FR)	4x	NA	Yes	Etang de Thau	France	Etang de Thau	Marseillan	-7	5	32	31	43.3305	3.54487	8.7	23.9	N/A	7.64	63	N/A	KAUST1959	777-1	Wild
SalD_166	Salicornia europaea (FR)	4x	NA	Yes	Etang de Thau	France	Etang de Thau	Marseillan	-7	5	32	31	43.3305	3.54487	8.7	23.9	N/A	7.64	63	N/A	KAUST1960	778-1	Wild
SalD_167	Salicornia europaea (FR)	4x	NA	Yes	Etang de Thau	France	Etang de Thau	Marseillan	-7	5	32	31	43.3305	3.54487	8.7	23.9	N/A	7.64	63	N/A	KAUST1961	779-2	Wild
SalD_168	Salicornia europaea (FR)	4x	NA	Yes	Etang de Thau	France	Etang de Thau	Marseillan	-7	5	32	31	43.3305	3.54487	8.7	23.9	N/A	7.64	63	N/A	KAUST1989	783-1	Wild
SalD_169	Salicornia europaea (FR)	4x	NA	Yes	Etang de Thau	France	Etang de Thau	Marseillan	-7	5	32	31	43.3305	3.54487	8.7	23.9	N/A	7.64	63	N/A	KAUST1990	784-2	Wild
SalD_17	Salicornia persica ssp. iranica (KSA)	2x	NA	Yes	QL-1	Kingdom of Saudi Arabia	Qassim, Qassim-Aushazia lake	Al Mithnab	18	19	45	34	25.9886	44.1798	8.7	10.8	8.8	8.1	55.5	12	KAUST1320	162-7	Wild
SalD_170	Salicornia europaea (FR)	4x	NA	Yes	Etang de Thau	France	Etang de Thau	Marseillan	-7	5	32	31	43.3305	3.54487	8.7	23.9	N/A	7.64	63	N/A	KAUST1991	785-1	Wild
SalD_172	Salicornia europaea (FR)	4x	NA	Yes	Etang de Thau	France	Etang de Thau	Marseillan	-7	5	32	31	43.3305	3.54487	8.7	23.9	N/A	7.64	63	N/A	KAUST1993	789-1	Wild
SalD_173	Salicornia europaea (FR)	4x	NA	Yes	Etang de Thau	France	Etang de Thau	Marseillan	-7	5	32	31	43.3305	3.54487	8.7	23.9	N/A	7.64	63	N/A	KAUST1962	832-1	Wild
SalD_174	Salicornia europaea (FR)	4x	NA	Yes	Etang de Thau	France	Etang de Thau	Marseillan	-7	5	32	31	43.3305	3.54487	8.7	23.9	N/A	7.64	63	N/A	KAUST1963	833-2	Wild
SalD_175	Salicornia europaea (FR)	4x	NA	Yes	Etang de Thau	France	Etang de Thau	Marseillan	-7	5	32	31	43.3305	3.54487	8.7	23.9	N/A	7.64	63	N/A	KAUST1994	834-2	Wild
SalD_176	Salicornia europaea (FR)	4x	NA	Yes	Etang de Thau	France	Etang de Thau	Marseillan	-7	5	32	31	43.3305	3.54487	8.7	23.9	N/A	7.64	63	N/A	KAUST1964	835-1	Wild
SalD_177	Salicornia europaea (FR)	4x	NA	Yes	Etang de Thau	France	Etang de Thau	Marseillan	-7	5	32	31	43.3305	3.54487	8.7	23.9	N/A	7.64	63	N/A	KAUST1965	836-1	Wild
SalD_178	Salicornia europaea (FR)	4x	NA	Yes	Etang de Thau	France	Etang de Thau	Marseillan	-7	5	32	31	43.3305	3.54487	8.7	23.9	N/A	7.64	63	N/A	KAUST1966	837-1	Wild
SalD_179	Salicornia europaea (FR)	4x	NA	Yes	Etang de Thau	France	Etang de Thau	Marseillan	-7	5	32	31	43.3305	3.54487	8.7	23.9	N/A	7.64	63	N/A	KAUST1967	838-2	Wild
SalD_180	Salicornia europaea (FR)	4x	NA	Yes	Etang de Thau	France	Etang de Thau	Marseillan	-7	5	32	31	43.3305	3.54487	8.7	23.9	N/A	7.64	63	N/A	KAUST1995	839-1	Wild
SalD_182	Salicornia europaea (FR)	4x	NA	Yes	Etang de Thau	France	Etang de Thau	Marseillan	-7	5	32	31	43.3305	3.54487	8.7	23.9	N/A	7.64	63	N/A	KAUST1968	841-1	Wild
SalD_183	Salicornia europaea (FR)	4x	NA	Yes	Etang de Thau	France	Etang de Thau	Marseillan	-7	5	32	31	43.3305	3.54487	8.7	23.9	N/A	7.64	63	N/A	KAUST1997	842-1	Wild
SalD_184	Salicornia europaea (FR)	4x	NA	Yes	Etang de Thau	France	Etang de Thau	Marseillan	-7	5	32	31	43.3305	3.54487	8.7	23.9	N/A	7.64	63	N/A	-	843-1	Wild
SalD_186	Salicornia europaea (FR)	4x	NA	Yes	Etang de Thau	France	Etang de Thau	Marseillan	-7	5	32	31	43.3305	3.54487	8.7	23.9	N/A	7.64	63	N/A	KAUST1969	846-2	Wild
SalD_187	Salicornia europaea (FR)	4x	NA	Yes	Etang de Thau	France	Etang de Thau	Marseillan	-7	5	32	31	43.3305	3.54487	8.7	23.9	N/A	7.64	63	N/A	KAUST1999	847-1	Wild
SalD_188	Salicornia europaea (FR)	4x	NA	Yes	Etang de Thau	France	Etang de Thau	Marseillan	-7	5	32	31	43.3305	3.54487	8.7	23.9	N/A	7.64	63	N/A	KAUST1970	848-1	Wild
SalD_189	Salicornia europaea (FR)	4x	NA	Yes	Etang de Thau	France	Etang de Thau	Marseillan	-7	5	32	31	43.3305	3.54487	8.7	23.9	N/A	7.64	63	N/A	KAUST2000	849-1	Wild
SalD_190	Sarcocornia fructicosa (ITA)	4x	3481	Yes	Venetian Lagoon	Italy	Venetian Lagoon	Chioggia	9	13	29	18	45.2494	12.2243	8.66	4.47	N/A	N/A	N/A	29.2	KAUST2053	931-3	Wild
SalD_191	Salicornia persica ssp. iranica (KSA)	2x	NA	Yes	QL-3	Kingdom of Saudi Arabia	Qassim, Qassim-Aushazia lake	Al Mithnab	18	19	45	34	26.0623	44.1414	8.7	10.8	22	8.1	55.5	12	KAUST1000	NA	KAUST239
SalD_192	Salicornia persica ssp. iranica (KSA)	2x	NA	Yes	QL-3	Kingdom of Saudi Arabia	Qassim, Qassim-Aushazia lake	Al Mithnab	18	19	45	34	26.0623	44.1414	8.7	10.8	22	8.1	55.5	12	KAUST1002	NA	KAUST240
SalD_193	Salicornia persica ssp. iranica (KSA)	2x	NA	Yes	QL-1	Kingdom of Saudi Arabia	Qassim, Qassim-Aushazia lake	Al Mithnab	18	19	45	34	25.9886	44.1798	8.7	10.8	8.8	8.1	55.5	12	KAUST1025	NA	KAUST272
SalD_194	Salicornia persica ssp. iranica (KSA)	2x	NA	Yes	QL-1	Kingdom of Saudi Arabia	Qassim, Qassim-Aushazia lake	Al Mithnab	18	19	45	34	25.9886	44.1798	8.7	10.8	8.8	8.1	55.5	12	KAUST1028	NA	KAUST175
SalD_195	Salicornia persica ssp. iranica (KSA)	2x	NA	Yes	QL-3	Kingdom of Saudi Arabia	Qassim, Qassim-Aushazia lake	Al Mithnab	18	19	45	34	26.0623	44.1414	8.7	10.8	22	8.1	55.5	12	KAUST1035	NA	KAUST221
SalD_196	Salicornia persica ssp. iranica (KSA)	2x	NA	Yes	QL-1	Kingdom of Saudi Arabia	Qassim, Qassim-Aushazia lake	Al Mithnab	18	19	45	34	25.9886	44.1798	8.7	10.8	8.8	8.1	55.5	12	KAUST1049	NA	KAUST164
SalD_197	Salicornia persica ssp. iranica (KSA)	2x	NA	Yes	QL-1	Kingdom of Saudi Arabia	Qassim, Qassim-Aushazia lake	Al Mithnab	18	19	45	34	25.9886	44.1798	8.7	10.8	8.8	8.1	55.5	12	KAUST1050	NA	KAUST169
SalD_198	Salicornia persica ssp. iranica (KSA)	2x	NA	Yes	QL-3	Kingdom of Saudi Arabia	Qassim, Qassim-Aushazia lake	Al Mithnab	18	19	45	34	26.0623	44.1414	8.7	10.8	22	8.1	55.5	12	KAUST1053	NA	KAUST193
SalD_199	Salicornia persica ssp. iranica (KSA)	2x	NA	Yes	QL-3	Kingdom of Saudi Arabia	Qassim, Qassim-Aushazia lake	Al Mithnab	18	19	45	34	26.0623	44.1414	8.7	10.8	22	8.1	55.5	12	KAUST1059	NA	KAUST196
SalD_20	Salicornia persica ssp. iranica (KSA)	2x	NA	Yes	QL-2	Kingdom of Saudi Arabia	Qassim, Qassim-Aushazia lake	Al Mithnab	18	19	45	34	25.9537	44.2017	8.7	10.8	8.9	8.1	55.5	12	KAUST1326	187-4	Wild
SalD_200	Salicornia persica ssp. iranica (KSA)	2x	NA	Yes	QL-3	Kingdom of Saudi Arabia	Qassim, Qassim-Aushazia lake	Al Mithnab	18	19	45	34	26.0623	44.1414	8.7	10.8	22	8.1	55.5	12	KAUST1069	NA	KAUST202
SalD_201	Salicornia persica ssp. iranica (KSA)	2x	NA	Yes	QL-3	Kingdom of Saudi Arabia	Qassim, Qassim-Aushazia lake	Al Mithnab	18	19	45	34	26.0623	44.1414	8.7	10.8	22	8.1	55.5	12	KAUST1070	NA	KAUST203
SalD_202	Salicornia persica ssp. iranica (KSA)	2x	NA	Yes	QL-3	Kingdom of Saudi Arabia	Qassim, Qassim-Aushazia lake	Al Mithnab	18	19	45	34	26.0623	44.1414	8.7	10.8	22	8.1	55.5	12	KAUST1080	NA	KAUST215
SalD_203	Salicornia persica ssp. iranica (KSA)	2x	NA	Yes	QL-3	Kingdom of Saudi Arabia	Qassim, Qassim-Aushazia lake	Al Mithnab	18	19	45	34	26.0623	44.1414	8.7	10.8	22	8.1	55.5	12	KAUST1085	NA	KAUST218
SalD_204	Salicornia persica ssp. iranica (KSA)	2x	NA	Yes	QL-3	Kingdom of Saudi Arabia	Qassim, Qassim-Aushazia lake	Al Mithnab	18	19	45	34	26.0623	44.1414	8.7	10.8	22	8.1	55.5	12	KAUST1117	NA	KAUST204
SalD_205	Salicornia persica ssp. iranica (KSA)	2x	NA	Yes	QL-1	Kingdom of Saudi Arabia	Qassim, Qassim-Aushazia lake	Al Mithnab	18	19	45	34	25.9886	44.1798	8.7	10.8	8.8	8.1	55.5	12	KAUST1122	NA	KAUST163
SalD_206	Salicornia persica ssp. iranica (KSA)	2x	NA	Yes	QL-1	Kingdom of Saudi Arabia	Qassim, Qassim-Aushazia lake	Al Mithnab	18	19	45	34	25.9886	44.1798	8.7	10.8	8.8	8.1	55.5	12	KAUST423	NA	KAUST423
SalD_207	Salicornia persica ssp. iranica (KSA)	2x	NA	Yes	QL-3	Kingdom of Saudi Arabia	Qassim, Qassim-Aushazia lake	Al Mithnab	18	19	45	34	26.0623	44.1414	8.7	10.8	22	8.1	55.5	12	KAUST425	NA	KAUST425
SalD_208	Salicornia persica ssp. iranica (KSA)	2x	NA	Yes	QL-1	Kingdom of Saudi Arabia	Qassim, Qassim-Aushazia lake	Al Mithnab	18	19	45	34	25.9886	44.1798	8.7	10.8	8.8	8.1	55.5	12	KAUST732	NA	KAUST179
SalD_209	Salicornia persica ssp. iranica (KSA)	2x	NA	Yes	QL-3	Kingdom of Saudi Arabia	Qassim, Qassim-Aushazia lake	Al Mithnab	18	19	45	34	26.0623	44.1414	8.7	10.8	22	8.1	55.5	12	KAUST748	NA	KAUST197
SalD_21	Salicornia persica ssp. iranica (KSA)	2x	NA	Yes	QL-2	Kingdom of Saudi Arabia	Qassim, Qassim-Aushazia lake	Al Mithnab	18	19	45	34	25.9537	44.2017	8.7	10.8	8.9	8.1	55.5	12	KAUST1330	188-6	KAUST188
SalD_210	Salicornia persica ssp. iranica (KSA)	2x	NA	Yes	QL-3	Kingdom of Saudi Arabia	Qassim, Qassim-Aushazia lake	Al Mithnab	18	19	45	34	26.0623	44.1414	8.7	10.8	22	8.1	55.5	12	KAUST749	NA	KAUST212
SalD_211	Salicornia persica ssp. iranica (KSA)	2x	NA	Yes	QL-3	Kingdom of Saudi Arabia	Qassim, Qassim-Aushazia lake	Al Mithnab	18	19	45	34	26.0623	44.1414	8.7	10.8	22	8.1	55.5	12	KAUST750	NA	KAUST216
SalD_212	Salicornia persica ssp. iranica (KSA)	2x	NA	Yes	QL-3	Kingdom of Saudi Arabia	Qassim, Qassim-Aushazia lake	Al Mithnab	18	19	45	34	26.0623	44.1414	8.7	10.8	22	8.1	55.5	12	KAUST751	NA	KAUST227
SalD_213	Salicornia persica ssp. iranica (KSA)	2x	NA	Yes	QL-3	Kingdom of Saudi Arabia	Qassim, Qassim-Aushazia lake	Al Mithnab	18	19	45	34	26.0623	44.1414	8.7	10.8	22	8.1	55.5	12	KAUST754	NA	KAUST235
SalD_214	Salicornia europaea (FR)	4x	NA	Yes	Etang de Thau	France	Etang de Thau	Marseillan	-7	5	32	31	43.3305	3.54487	8.7	23.9	N/A	7.64	63	N/A	KAUST1957	763-1	Wild
SalD_215	Salicornia europaea (FR)	4x	NA	Yes	Etang de Thau	France	Etang de Thau	Marseillan	-7	5	32	31	43.3305	3.54487	8.7	23.9	N/A	7.64	63	N/A	KAUST1983	764-1	Wild
SalD_216	Salicornia europaea (FR)	4x	NA	Yes	Etang de Thau	France	Etang de Thau	Marseillan	-7	5	32	31	43.3305	3.54487	8.7	23.9	N/A	7.64	63	N/A	KAUST1986	767-2	Wild
SalD_217	Salicornia europaea (FR)	4x	NA	Yes	Etang de Thau	France	Etang de Thau	Marseillan	-7	5	32	31	43.3305	3.54487	8.7	23.9	N/A	7.64	63	N/A	KAUST1992	787-2	Wild
SalD_218	Salicornia europaea (FR)	4x	NA	Yes	Etang de Thau	France	Etang de Thau	Marseillan	-7	5	32	31	43.3305	3.54487	8.7	23.9	N/A	7.64	63	N/A	KAUST1996	840-2	Wild
SalD_219	Salicornia europaea (FR)	4x	NA	Yes	Etang de Thau	France	Etang de Thau	Marseillan	-7	5	32	31	43.3305	3.54487	8.7	23.9	N/A	7.64	63	N/A	KAUST1998	845-2	Wild
SalD_220	Salicornia persica ssp. iranica (KSA)	2x	NA	Yes	QL-3	Kingdom of Saudi Arabia	Qassim, Qassim-Aushazia lake	Al Mithnab	18	19	45	34	26.0623	44.1414	8.7	10.8	22	8.1	55.5	12	KAUST857	NA	KAUST200
SalD_221	Salicornia persica ssp. iranica (KSA)	2x	NA	Yes	QL-1	Kingdom of Saudi Arabia	Qassim, Qassim-Aushazia lake	Al Mithnab	18	19	45	34	25.9886	44.1798	8.7	10.8	8.8	8.1	55.5	12	KAUST872	NA	KAUST174
SalD_222	Salicornia persica ssp. iranica (KSA)	2x	NA	Yes	QL-1	Kingdom of Saudi Arabia	Qassim, Qassim-Aushazia lake	Al Mithnab	18	19	45	34	25.9886	44.1798	8.7	10.8	8.8	8.1	55.5	12	KAUST873	NA	KAUST177
SalD_223	Salicornia persica ssp. iranica (KSA)	2x	NA	Yes	QL-1	Kingdom of Saudi Arabia	Qassim, Qassim-Aushazia lake	Al Mithnab	18	19	45	34	25.9886	44.1798	8.7	10.8	8.8	8.1	55.5	12	KAUST874	NA	KAUST178
SalD_224	Salicornia persica ssp. iranica (KSA)	2x	NA	Yes	QL-1	Kingdom of Saudi Arabia	Qassim, Qassim-Aushazia lake	Al Mithnab	18	19	45	34	25.9886	44.1798	8.7	10.8	8.8	8.1	55.5	12	KAUST935	NA	KAUST181
SalD_225	Salicornia persica ssp. iranica (KSA)	2x	NA	Yes	QL-3	Kingdom of Saudi Arabia	Qassim, Qassim-Aushazia lake	Al Mithnab	18	19	45	34	26.0623	44.1414	8.7	10.8	22	8.1	55.5	12	KAUST940	NA	KAUST192
SalD_226	Salicornia persica ssp. iranica (KSA)	2x	NA	Yes	QL-3	Kingdom of Saudi Arabia	Qassim, Qassim-Aushazia lake	Al Mithnab	18	19	45	34	26.0623	44.1414	8.7	10.8	22	8.1	55.5	12	KAUST944	NA	KAUST199
SalD_227	Salicornia persica ssp. iranica (KSA)	2x	NA	Yes	QL-3	Kingdom of Saudi Arabia	Qassim, Qassim-Aushazia lake	Al Mithnab	18	19	45	34	26.0623	44.1414	8.7	10.8	22	8.1	55.5	12	KAUST946	NA	KAUST206
SalD_228	Salicornia persica ssp. iranica (KSA)	2x	NA	Yes	QL-3	Kingdom of Saudi Arabia	Qassim, Qassim-Aushazia lake	Al Mithnab	18	19	45	34	26.0623	44.1414	8.7	10.8	22	8.1	55.5	12	KAUST948	NA	KAUST207
SalD_229	Salicornia persica ssp. iranica (KSA)	2x	NA	Yes	QL-3	Kingdom of Saudi Arabia	Qassim, Qassim-Aushazia lake	Al Mithnab	18	19	45	34	26.0623	44.1414	8.7	10.8	22	8.1	55.5	12	KAUST950	NA	KAUST208
SalD_230	Salicornia persica ssp. iranica (KSA)	2x	NA	Yes	QL-3	Kingdom of Saudi Arabia	Qassim, Qassim-Aushazia lake	Al Mithnab	18	19	45	34	26.0623	44.1414	8.7	10.8	22	8.1	55.5	12	KAUST953	NA	KAUST209
SalD_231	Salicornia persica ssp. iranica (KSA)	2x	NA	Yes	QL-3	Kingdom of Saudi Arabia	Qassim, Qassim-Aushazia lake	Al Mithnab	18	19	45	34	26.0623	44.1414	8.7	10.8	22	8.1	55.5	12	KAUST956	NA	KAUST211
SalD_232	Salicornia persica ssp. iranica (KSA)	2x	NA	Yes	QL-3	Kingdom of Saudi Arabia	Qassim, Qassim-Aushazia lake	Al Mithnab	18	19	45	34	26.0623	44.1414	8.7	10.8	22	8.1	55.5	12	KAUST959	NA	KAUST213
SalD_233	Salicornia persica ssp. iranica (KSA)	2x	NA	Yes	QL-3	Kingdom of Saudi Arabia	Qassim, Qassim-Aushazia lake	Al Mithnab	18	19	45	34	26.0623	44.1414	8.7	10.8	22	8.1	55.5	12	KAUST964	NA	KAUST217
SalD_235	Salicornia persica ssp. iranica (KSA)	2x	NA	Yes	QL-3	Kingdom of Saudi Arabia	Qassim, Qassim-Aushazia lake	Al Mithnab	18	19	45	34	26.0623	44.1414	8.7	10.8	22	8.1	55.5	12	KAUST966	NA	KAUST223
SalD_236	Salicornia persica ssp. iranica (KSA)	2x	NA	Yes	QL-3	Kingdom of Saudi Arabia	Qassim, Qassim-Aushazia lake	Al Mithnab	18	19	45	34	26.0623	44.1414	8.7	10.8	22	8.1	55.5	12	KAUST968	NA	KAUST224
SalD_237	Salicornia persica ssp. iranica (KSA)	2x	NA	Yes	QL-3	Kingdom of Saudi Arabia	Qassim, Qassim-Aushazia lake	Al Mithnab	18	19	45	34	26.0623	44.1414	8.7	10.8	22	8.1	55.5	12	KAUST974	NA	KAUST226
SalD_238	Salicornia persica ssp. iranica (KSA)	2x	NA	Yes	QL-3	Kingdom of Saudi Arabia	Qassim, Qassim-Aushazia lake	Al Mithnab	18	19	45	34	26.0623	44.1414	8.7	10.8	22	8.1	55.5	12	KAUST978	NA	KAUST229
SalD_239	Salicornia persica ssp. iranica (KSA)	2x	NA	Yes	QL-3	Kingdom of Saudi Arabia	Qassim, Qassim-Aushazia lake	Al Mithnab	18	19	45	34	26.0623	44.1414	8.7	10.8	22	8.1	55.5	12	KAUST981	NA	KAUST230
SalD_24	Salicornia persica ssp. iranica (KSA)	2x	NA	Yes	QL-2	Kingdom of Saudi Arabia	Qassim, Qassim-Aushazia lake	Al Mithnab	18	19	45	34	25.9537	44.2017	8.7	10.8	8.9	8.1	55.5	12	NA	191-5	Wild
SalD_240	Salicornia persica ssp. iranica (KSA)	2x	NA	Yes	QL-3	Kingdom of Saudi Arabia	Qassim, Qassim-Aushazia lake	Al Mithnab	18	19	45	34	26.0623	44.1414	8.7	10.8	22	8.1	55.5	12	KAUST986	NA	KAUST232
SalD_241	Salicornia persica ssp. iranica (KSA)	2x	NA	Yes	QL-3	Kingdom of Saudi Arabia	Qassim, Qassim-Aushazia lake	Al Mithnab	18	19	45	34	26.0623	44.1414	8.7	10.8	22	8.1	55.5	12	KAUST989	NA	KAUST233
SalD_242	Salicornia persica ssp. iranica (KSA)	2x	NA	Yes	QL-3	Kingdom of Saudi Arabia	Qassim, Qassim-Aushazia lake	Al Mithnab	18	19	45	34	26.0623	44.1414	8.7	10.8	22	8.1	55.5	12	KAUST992	NA	KAUST234
SalD_243	Tecticornia arbuscula (AU)	N/A	2548	Yes	South Australia	Australia	South Australia	Adelaide		6		29	-34.7344	138.53	8.25	3.6	N/A	7.2	0.07	N/A	NA	NA	Wild
SalD_244	Salicornia europaea (FR)	4x	NA	Yes	Etang de Thau	France	Etang de Thau	Marseillan	-7	5	32	31	43.3305	3.54487	8.7	23.9	N/A	7.64	63	N/A	KAUST2007	1229-1	KAUST771
SalD_245	Salicornia europaea (FR)	4x	NA	Yes	Etang de Thau	France	Etang de Thau	Marseillan	-7	5	32	31	43.3305	3.54487	8.7	23.9	N/A	7.64	63	N/A	KAUST2008	1230-1	KAUST772
SalD_246	Salicornia europaea (FR)	4x	NA	Yes	Etang de Thau	France	Etang de Thau	Marseillan	-7	5	32	31	43.3305	3.54487	8.7	23.9	N/A	7.64	63	N/A	KAUST2009	1231-1	KAUST774
SalD_247	Salicornia europaea (FR)	4x	NA	Yes	Etang de Thau	France	Etang de Thau	Marseillan	-7	5	32	31	43.3305	3.54487	8.7	23.9	N/A	7.64	63	N/A	KAUST2010	1234-1	KAUST786
SalD_248	Salicornia europaea (FR)	4x	NA	Yes	Etang de Thau	France	Etang de Thau	Marseillan	-7	5	32	31	43.3305	3.54487	8.7	23.9	N/A	7.64	63	N/A	KAUST2011	1235-1	KAUST790
SalD_249	Salicornia europaea (FR)	4x	NA	Yes	Etang de Thau	France	Etang de Thau	Marseillan	-7	5	32	31	43.3305	3.54487	8.7	23.9	N/A	7.64	63	N/A	KAUST2012	1236-1	KAUST791
SalD_250	Salicornia europaea (FR)	4x	NA	Yes	Etang de Thau	France	Etang de Thau	Marseillan	-7	5	32	31	43.3305	3.54487	8.7	23.9	N/A	7.64	63	N/A	KAUST2014	1238-1	KAUST793
SalD_251	Salicornia europaea (FR)	4x	NA	Yes	Etang de Thau	France	Etang de Thau	Marseillan	-7	5	32	31	43.3305	3.54487	8.7	23.9	N/A	7.64	63	N/A	KAUST2015	1241-1	KAUST798
SalD_252	Salicornia europaea (FR)	4x	NA	Yes	Etang de Thau	France	Etang de Thau	Marseillan	-7	5	32	31	43.3305	3.54487	8.7	23.9	N/A	7.64	63	N/A	KAUST2016	1242-1	KAUST799
SalD_253	Salicornia europaea (FR)	4x	NA	Yes	Etang de Thau	France	Etang de Thau	Marseillan	-7	5	32	31	43.3305	3.54487	8.7	23.9	N/A	7.64	63	N/A	KAUST2017	1243-1	KAUST800
SalD_254	Salicornia europaea (FR)	4x	NA	Yes	Etang de Thau	France	Etang de Thau	Marseillan	-7	5	32	31	43.3305	3.54487	8.7	23.9	N/A	7.64	63	N/A	KAUST2018	1244-1	KAUST801
SalD_255	Salicornia europaea (FR)	4x	NA	Yes	Etang de Thau	France	Etang de Thau	Marseillan	-7	5	32	31	43.3305	3.54487	8.7	23.9	N/A	7.64	63	N/A	KAUST2019	1245-1	KAUST802
SalD_256	Salicornia europaea (FR)	4x	NA	Yes	Etang de Thau	France	Etang de Thau	Marseillan	-7	5	32	31	43.3305	3.54487	8.7	23.9	N/A	7.64	63	N/A	KAUST2021	1249-1	KAUST806
SalD_257	Salicornia europaea (FR)	4x	NA	Yes	Etang de Thau	France	Etang de Thau	Marseillan	-7	5	32	31	43.3305	3.54487	8.7	23.9	N/A	7.64	63	N/A	KAUST2022	1251-1	KAUST808
SalD_258	Salicornia europaea (FR)	4x	NA	Yes	Etang de Thau	France	Etang de Thau	Marseillan	-7	5	32	31	43.3305	3.54487	8.7	23.9	N/A	7.64	63	N/A	KAUST2023	1252-1	KAUST809
SalD_259	Salicornia europaea (FR)	4x	NA	Yes	Etang de Thau	France	Etang de Thau	Marseillan	-7	5	32	31	43.3305	3.54487	8.7	23.9	N/A	7.64	63	N/A	KAUST2024	1253-1	KAUST810
SalD_26	Salicornia persica ssp. iranica (KSA)	2x	NA	Yes	QL-3	Kingdom of Saudi Arabia	Qassim, Qassim-Aushazia lake	Al Mithnab	18	19	45	34	26.0623	44.1414	8.7	10.8	22	8.1	55.5	12	KAUST1342	210-2	Wild
SalD_260	Salicornia europaea (FR)	4x	NA	Yes	Etang de Thau	France	Etang de Thau	Marseillan	-7	5	32	31	43.3305	3.54487	8.7	23.9	N/A	7.64	63	N/A	KAUST2025	1254-1	KAUST811
SalD_261	Salicornia europaea (FR)	4x	NA	Yes	Etang de Thau	France	Etang de Thau	Marseillan	-7	5	32	31	43.3305	3.54487	8.7	23.9	N/A	7.64	63	N/A	KAUST2026	1255-1	KAUST812
SalD_262	Salicornia europaea (FR)	4x	NA	Yes	Etang de Thau	France	Etang de Thau	Marseillan	-7	5	32	31	43.3305	3.54487	8.7	23.9	N/A	7.64	63	N/A	KAUST2027	1258-1	KAUST815
SalD_263	Salicornia europaea (FR)	4x	NA	Yes	Etang de Thau	France	Etang de Thau	Marseillan	-7	5	32	31	43.3305	3.54487	8.7	23.9	N/A	7.64	63	N/A	KAUST2028	1259-1	KAUST816
SalD_264	Salicornia europaea (FR)	4x	NA	Yes	Etang de Thau	France	Etang de Thau	Marseillan	-7	5	32	31	43.3305	3.54487	8.7	23.9	N/A	7.64	63	N/A	KAUST2029	1260-1	KAUST817
SalD_265	Salicornia europaea (FR)	4x	NA	Yes	Etang de Thau	France	Etang de Thau	Marseillan	-7	5	32	31	43.3305	3.54487	8.7	23.9	N/A	7.64	63	N/A	KAUST2030	1263-1	KAUST820
SalD_266	Salicornia europaea (FR)	4x	NA	Yes	Etang de Thau	France	Etang de Thau	Marseillan	-7	5	32	31	43.3305	3.54487	8.7	23.9	N/A	7.64	63	N/A	KAUST2031	1264-1	KAUST821
SalD_267	Salicornia europaea (FR)	4x	NA	Yes	Etang de Thau	France	Etang de Thau	Marseillan	-7	5	32	31	43.3305	3.54487	8.7	23.9	N/A	7.64	63	N/A	KAUST2032	1265-1	KAUST823
SalD_268	Salicornia europaea (FR)	4x	NA	Yes	Etang de Thau	France	Etang de Thau	Marseillan	-7	5	32	31	43.3305	3.54487	8.7	23.9	N/A	7.64	63	N/A	KAUST2033	1266-1	KAUST826
SalD_269	Salicornia europaea (FR)	4x	NA	Yes	Etang de Thau	France	Etang de Thau	Marseillan	-7	5	32	31	43.3305	3.54487	8.7	23.9	N/A	7.64	63	N/A	KAUST2034	1267-1	KAUST827
SalD_27	Salicornia persica ssp. iranica (KSA)	2x	NA	Yes	QL-3	Kingdom of Saudi Arabia	Qassim, Qassim-Aushazia lake	Al Mithnab	18	19	45	34	26.0623	44.1414	8.7	10.8	22	8.1	55.5	12 ppt	KAUST1344	212-1	Wild
SalD_270	Salicornia europaea (FR)	4x	NA	Yes	Etang de Thau	France	Etang de Thau	Marseillan	-7	5	32	31	43.3305	3.54487	8.7	23.9	N/A	7.64	63	N/A	KAUST2035	1268-1	KAUST828
SalD_271	Salicornia europaea (FR)	4x	NA	Yes	Etang de Thau	France	Etang de Thau	Marseillan	-7	5	32	31	43.3305	3.54487	8.7	23.9	N/A	7.64	63	N/A	KAUST2036	1269-1	KAUST830
SalD_272	Salicornia europaea (FR)	4x	NA	Yes	Etang de Thau	France	Etang de Thau	Marseillan	-7	5	32	31	43.3305	3.54487	8.7	23.9	N/A	7.64	63	N/A	KAUST2037	1271-1	KAUST850
SalD_273	Salicornia europaea (FR)	4x	NA	Yes	Etang de Thau	France	Etang de Thau	Marseillan	-7	5	32	31	43.3305	3.54487	8.7	23.9	N/A	7.64	63	N/A	KAUST2038	1272-1	KAUST852
SalD_274	Salicornia europaea (FR)	4x	NA	Yes	Etang de Thau	France	Etang de Thau	Marseillan	-7	5	32	31	43.3305	3.54487	8.7	23.9	N/A	7.64	63	N/A	KAUST2039	1273-1	KAUST853
SalD_275	Tecticornia pergranulata (AU)	4x	NA	Yes	South Australia	Australia	South Australia	Adelaide		6		29	-34.7345	138.533	8.75	6.6	N/A	7.31	0.16	N/A	-	KAUST13-2	Wild
SalD_276	Tecticornia pruinosa (AU)	N/A	3237	Yes	South Australia	Australia	South Australia	Adelaide		6		29	-34.7377	138.543	8.15	4.2	N/A	7.24	0.15	N/A	-	KAUST14-2	Wild
SalD_277	Tecticornia syncarpa (AU)	N/A	1174	Yes	South Australia	Australia	South Australia	Adelaide		6		29	-34.7361	138.541	8.21	8.4	N/A	7.28	1.4	N/A	-	KAUST15-1	Wild
SalD_278	Tecticornia pergranulata (AU)	4x	NA	Yes	South Australia	Australia	South Australia	Adelaide		6		29	-34.7345	138.533	8.75	6.6	N/A	7.31	0.16	N/A	-	KAUST16-1	Wild
SalD_279	Tecticornia pergranulata (AU)	4x	1498	Yes	South Australia	Australia	South Australia	Adelaide		6		29	-34.7345	138.533	8.75	6.6	N/A	7.31	0.16	N/A	-	KAUST17-1	Wild
SalD_28	Salicornia persica ssp. iranica (KSA)	2x	NA	Yes	QL-3	Kingdom of Saudi Arabia	Qassim, Qassim-Aushazia lake	Al Mithnab	18	19	45	34	26.0623	44.1414	8.7	10.8	22	8.1	55.5	12	KAUST1345	214-1	Wild
SalD_280	Tecticornia pergranulata (AU)	4x	NA	Yes	South Australia	Australia	South Australia	Adelaide		6		29	-34.7345	138.533	8.75	6.6	N/A	7.31	0.16	N/A	-	KAUST18-2	Wild
SalD_281	Tecticornia halocnemoides (AU)	4x	1522	Yes	South Australia	Australia	South Australia	Adelaide		6		29	-34.7353	138.531	8.77	1.5	N/A	6.67	0.08	N/A	-	KAUST19-2	Wild
SalD_282	Tecticornia halocnemoides (AU)	4x	NA	Yes	South Australia	Australia	South Australia	Adelaide		6		29	-34.7353	138.531	8.77	1.5	N/A	6.67	0.08	N/A	-	KAUST20-1	Wild
SalD_283	Sarcocornia fructicosa (FR)	N/A	3374	Yes	Foret communale de Leucate	France	Port Leucate	Leucate	12	13	30	21	42.918	3.06029	9.45	15.84	41	8.25	55.6	12.5	-	KAUST893-1	Wild
SalD_284	Salicornia bigelovii (MX)	4x	2401	Yes	Kino Bay	Mexico	Kino Bay	Bahia Kino	11	17	36	32	28.7963	-111.915	8.43	4.5	N/A	8.29	40	N/A	-	K1	Wild
SalD_285	Salicornia bigelovii (MX)	4x	2401	Yes	Kino Bay	Mexico	Kino Bay	Bahia Kino	11	17	36	32	28.7963	-111.915	8.43	4.5	N/A	8.29	40	N/A	-	K2	Wild
SalD_286	Salicornia bigelovii (MX)	4x	2401	Yes	Kino Bay	Mexico	Kino Bay	Bahia Kino	11	17	36	32	28.7987	-111.917	8.43	4.5	N/A	8.29	40	N/A	-	K3	Wild
SalD_287	Salicornia bigelovii (MX)	4x	2401	Yes	Kino Bay	Mexico	Kino Bay	Bahia Kino	11	17	36	32	28.7987	-111.917	8.43	4.5	N/A	8.29	40	N/A	-	K4	Wild
SalD_288	Salicornia species (ROK)	4x	NA	Yes	Jeollanam-do	Republic of Korea	Jeollanam-do	Jido		-9		29	35.0414	126.187	6.9	10.1	N/A	7.6	41.8	N/A	-	farm_a	Farm
SalD_289	Salicornia species (ROK)	4x	NA	Yes	Jeollanam-do	Republic of Korea	Jeollanam-do	Jido		-9		29	35.0414	126.187	6.9	10.1	N/A	7.6	41.8	N/A	-	K1a	Farm
SalD_29	Salicornia persica ssp. iranica (KSA)	2x	NA	Yes	QL-3	Kingdom of Saudi Arabia	Qassim, Qassim-Aushazia lake	Al Mithnab	18	19	45	34	26.0623	44.1414	8.7	10.8	22	8.1	55.5	12 ppt	-	216-4	Wild
SalD_290	Salicornia species (ROK)	4x	NA	Yes	Jeollanam-do	Republic of Korea	Jeollanam-do	Jido		-9		29	35.0414	126.187	6.9	10.1	N/A	7.6	41.8	N/A	-	K3a	Farm
SalD_291	Salicornia species (ROK)	4x	NA	Yes	Jeollanam-do	Republic of Korea	Jeollanam-do	Jido		-9		29	35.0414	126.187	6.9	10.1	N/A	7.6	41.8	N/A	-	K4a	Farm
SalD_292	Salicornia species (ROK)	4x	NA	Yes	Jeollanam-do	Republic of Korea	Jeollanam-do	Jido		-9		29	35.0414	126.187	6.9	10.1	N/A	7.6	41.8	N/A	-	K5b	Farm
SalD_293	Salicornia species (ROK)	4x	NA	Yes	Jeollanam-do	Republic of Korea	Jeollanam-do	Jido		-9		29	34.695	126.363	6.9	10.1	N/A	7.6	41.8	N/A	-	O1a	Farm
SalD_294	Salicornia species (ROK)	4x	NA	Yes	Jeollanam-do	Republic of Korea	Jeollanam-do	Jido		-9		29	34.695	126.363	6.9	10.1	N/A	7.6	41.8	N/A	-	O2a	Farm
SalD_295	Salicornia species (ROK)	4x	NA	Yes	Jeollanam-do	Republic of Korea	Jeollanam-do	Jido		-9		29	34.695	126.363	6.9	10.1	N/A	7.6	41.8	N/A	-	O5d	Farm
SalD_296	Salicornia species (ROK)	4x	NA	Yes	Jeollanam-do	Republic of Korea	Jeollanam-do	Jido		-9		29	34.695	126.363	6.9	10.1	N/A	7.6	41.8	N/A	-	O6a	Farm
SalD_297	Salicornia species (ROK)	4x	NA	Yes	Jeollanam-do	Republic of Korea	Jeollanam-do	Jido		-9		29	34.695	126.363	6.9	10.1	N/A	7.6	41.8	N/A	-	O7a	Farm
SalD_298	Salicornia species (ROK)	4x	NA	Yes	Jeollanam-do	Republic of Korea	Jeollanam-do	Jido		-9		29	36.9544	126.363	6.9	10.1	N/A	7.6	41.8	N/A	-	S1	Farm
SalD_299	Salicornia species (ROK)	4x	NA	Yes	Jeollanam-do	Republic of Korea	Jeollanam-do	Jido		-9		29	36.9544	126.363	6.9	10.1	N/A	7.6	41.8	N/A	-	S10	Farm
SalD_30	Salicornia brachiata (IN)	2x	553	Yes	Gujarat-Bhavnagar	India	Gujarat-Bhavnagar	Bhavnagar		16		38	21.7918	72.2338	8	1.8-9.6	N/A	N/A	N/A	N/A	-	22-1	Wild
SalD_300	Salicornia species (ROK)	4x	NA	Yes	Jeollanam-do	Republic of Korea	Jeollanam-do	Jido		-9		29	36.9544	126.363	6.9	10.1	N/A	7.6	41.8	N/A	-	S14	Farm
SalD_301	Salicornia species (ROK)	4x	NA	Yes	Jeollanam-do	Republic of Korea	Jeollanam-do	Jido		-9		29	36.9544	126.363	6.9	10.1	N/A	7.6	41.8	N/A	-	S2	Farm
SalD_302	Salicornia species (ROK)	4x	NA	Yes	Jeollanam-do	Republic of Korea	Jeollanam-do	Jido		-9		29	36.9544	126.363	6.9	10.1	N/A	7.6	41.8	N/A	-	S4	Farm
SalD_303	Salicornia procumbens (NL)	4x	NA	Yes	North Sea	the Kingdom of the Netherlands	Terschelling	Terschelling		5		20	53.3568	5.20568	8.5	1.67	N/A	7.24	62	N/A	-	Sample West1	Wild		https://natuurtijdschriften.nl/pub/1021200
SalD_304	Salicornia procumbens (NL)	4x	NA	Yes	North Sea	the Kingdom of the Netherlands	Terschelling	Terschelling		5		20	53.3567	5.20446	8.5	1.67	N/A	7.24	62	N/A	-	Sample West2	Wild		https://natuurtijdschriften.nl/pub/1021200
SalD_305	Salicornia procumbens (NL)	4x	NA	Yes	North Sea	the Kingdom of the Netherlands	Terschelling	Terschelling		5		20	53.3564	5.20274	8.5	1.67	N/A	7.24	62	N/A	-	Sample West3	Wild		https://natuurtijdschriften.nl/pub/1021200
SalD_306	Salicornia procumbens (NL)	4x	NA	Yes	North Sea	the Kingdom of the Netherlands	Terschelling	Terschelling		5		20	53.3568	5.20568	8.5	1.67	N/A	7.24	62	N/A	-	Sample West4	Wild		https://natuurtijdschriften.nl/pub/1021200
SalD_307	Salicornia procumbens (NL)	4x	NA	Yes	North Sea	the Kingdom of the Netherlands	Terschelling	Terschelling		5		20	53.3567	5.20446	8.5	1.67	N/A	7.24	62	N/A	-	Sample West5	Wild		https://natuurtijdschriften.nl/pub/1021200
SalD_308	Salicornia procumbens (NL)	4x	NA	Yes	North Sea	the Kingdom of the Netherlands	Terschelling	Terschelling		5		20	53.3564	5.20274	8.5	1.67	N/A	7.24	62	N/A	-	Sample West6	Wild		https://natuurtijdschriften.nl/pub/1021200
SalD_309	Salicornia procumbens (NL)	4x	NA	Yes	Wadden Sea	the Kingdom of the Netherlands	Terschelling	Terschelling		5		20	53.3761	5.29487	8.2	5.85	N/A	7.19	72	N/A	-	Sample Mid1	Wild		https://natuurtijdschriften.nl/pub/1021200
SalD_31	Salicornia persica ssp. iranica (KSA)	2x	580	Yes	QL-3	Kingdom of Saudi Arabia	Qassim, Qassim-Aushazia lake	Al Mithnab	18	19	45	34	26.0623	44.1414	8.7	10.8	22	8.1	55.5	12	-	223-7	Wild
SalD_310	Salicornia procumbens (NL)	4x	N/A	Yes	Wadden Sea	the Kingdom of the Netherlands	Terschelling	Terschelling		5		20	53.3761	5.29487	8.2	5.85	N/A	7.19	72	N/A	-	Sample Mid2	Wild		https://natuurtijdschriften.nl/pub/1021200
SalD_311	Salicornia procumbens (NL)	4x	N/A	Yes	Wadden Sea	the Kingdom of the Netherlands	Terschelling	Terschelling		5		20	53.376	5.29476	8.2	5.85	N/A	7.19	72	N/A	-	Sample Mid3	Wild		https://natuurtijdschriften.nl/pub/1021200
SalD_312	Salicornia procumbens (NL)	4x	N/A	Yes	Wadden Sea	the Kingdom of the Netherlands	Terschelling	Terschelling		5		20	53.376	5.29476	8.2	5.85	N/A	7.19	72	N/A	-	Sample Mid4	Wild		https://natuurtijdschriften.nl/pub/1021200
SalD_313	Salicornia procumbens (NL)	4x	N/A	Yes	Wadden Sea	the Kingdom of the Netherlands	Terschelling	Terschelling		5		20	53.3762	5.2951	8.2	5.85	N/A	7.19	72	N/A	-	Sample Mid5	Wild		https://natuurtijdschriften.nl/pub/1021200
SalD_314	Salicornia procumbens (NL)	4x	N/A	Yes	Wadden Sea	the Kingdom of the Netherlands	Terschelling	Terschelling		5		20	53.3762	5.2951	8.2	5.85	N/A	7.19	72	N/A	-	Sample Mid6	Wild		https://natuurtijdschriften.nl/pub/1021200
SalD_315	Salicornia europaea (NL)	2x	N/A	Yes	East Priel Saltmarsh	the Kingdom of the Netherlands	Terschelling	Terschelling		5		20	53.4214	5.47035	8.3	4.25	N/A	7.43	43.4	N/A	-	Sample East1	Wild		https://www.floravannederland.nl/planten/kortarige_zeekraal
SalD_316	Salicornia europaea (NL)	2x	N/A	Yes	East Priel Saltmarsh	the Kingdom of the Netherlands	Terschelling	Terschelling		5		20	53.4214	5.47035	8.3	4.25	N/A	7.43	43.4	N/A	-	Sample East2	Wild		https://www.floravannederland.nl/planten/kortarige_zeekraal
SalD_317	Salicornia europaea (NL)	2x	N/A	Yes	East Priel Saltmarsh	the Kingdom of the Netherlands	Terschelling	Terschelling		5		20	53.4214	5.47044	8.3	4.25	N/A	7.43	43.4	N/A	-	Sample East3	Wild		https://www.floravannederland.nl/planten/kortarige_zeekraal
SalD_318	Salicornia europaea (NL)	2x	N/A	Yes	East Priel Saltmarsh	the Kingdom of the Netherlands	Terschelling	Terschelling		5		20	53.4214	5.47044	8.3	4.25	N/A	7.43	43.4	N/A	-	Sample East4	Wild		https://www.floravannederland.nl/planten/kortarige_zeekraal
SalD_319	Salicornia europaea (NL)	2x	N/A	Yes	East Priel Saltmarsh	the Kingdom of the Netherlands	Terschelling	Terschelling		5		20	53.4185	5.47382	8.3	4.25	N/A	7.43	43.4	N/A	-	Sample East5	Wild		https://www.floravannederland.nl/planten/kortarige_zeekraal
SalD_32	Salicornia persica ssp. iranica (KSA)	2x	N/A	Yes	QL-3	Kingdom of Saudi Arabia	Qassim, Qassim-Aushazia lake	Al Mithnab	18	19	45	34	26.0623	44.1414	8.7	10.8	22	8.1	55.5	12	KAUST1351	225-4	KAUST225
SalD_320	Salicornia europaea (NL)	2x	N/A	Yes	East Priel Saltmarsh	the Kingdom of the Netherlands	Terschelling	Terschelling		5		20	53.4185	5.47382	8.3	4.25	N/A	7.43	43.4	N/A	-	Sample East6	Wild		https://www.floravannederland.nl/planten/kortarige_zeekraal
SalD_321	Salicornia sinus-persica (KSA)	2x	N/A	Yes	Tarout Island	Kingdom of Saudi Arabia	Tarout Island	Tarout	11	18	43	33	26.5913	50.0465	8.7	9.2	14.9	8.1	50	14.9	-	1006-1-1U	KAUST1006
SalD_322	Salicornia sinus-persica (KSA)	2x	N/A	Yes	Tarout Island	Kingdom of Saudi Arabia	Tarout Island	Tarout	11	18	43	33	26.5913	50.0465	8.7	9.2	14.9	8.1	50	14.9	-	1006-1-7U	KAUST1006
SalD_323	Salicornia sinus-persica (KSA)	2x	N/A	Yes	Tarout Island	Kingdom of Saudi Arabia	Tarout Island	Tarout	11	18	43	33	26.5913	50.0465	8.7	9.2	14.9	8.1	50	14.9	-	1006-1-8U	KAUST1006
SalD_324	Salicornia sinus-persica (KSA)	2x	N/A	Yes	Tarout Island	Kingdom of Saudi Arabia	Tarout Island	Tarout	11	18	43	33	26.5913	50.0465	8.7	9.2	14.9	8.1	50	14.9	-	1013-1-3U	KAUST1013
SalD_325	Salicornia sinus-persica (KSA)	2x	N/A	Yes	Tarout Island	Kingdom of Saudi Arabia	Tarout Island	Tarout	11	18	43	33	26.5913	50.0465	8.7	9.2	14.9	8.1	50	14.9	-	1013-2-2U	KAUST1013
SalD_326	Salicornia sinus-persica (KSA)	2x	N/A	Yes	Tarout Island	Kingdom of Saudi Arabia	Tarout Island	Tarout	11	18	43	33	26.5913	50.0465	8.7	9.2	14.9	8.1	50	14.9	-	1013-2-3U	KAUST1013
SalD_327	Salicornia sinus-persica (KSA)	2x	N/A	Yes	Tarout Island	Kingdom of Saudi Arabia	Tarout Island	Tarout	11	18	43	33	26.5913	50.0465	8.7	9.2	14.9	8.1	50	14.9	-	1013-3-1N	KAUST1013
SalD_329	Salicornia europaea (CN)	4x	1000	Yes	Jingtai	the People's Republic of China	Jingtai	Jingtai	-20	6	38	36	37.2503	104.522	7.72	4.96	N/A	7.81	6.72	N/A	-	NA	Wild
SalD_33	Salicornia persica ssp. iranica (KSA)	2x	NA	Yes	QL-3	Kingdom of Saudi Arabia	Qassim, Qassim-Aushazia lake	Al Mithnab	18	19	45	34	26.0623	44.1414	8.7	10.8	22	8.1	55.5	12	-	227-7	Wild
SalD_332	Salicornia europaea (CN)	4x	1000	Yes	Jingtai	the People's Republic of China	Jingtai	Jingtai	-20	6	38	36	37.3958	104.077	7.72	4.96	N/A	7.81	6.72	N/A	-	NA	Wild
SalD_336	Salicornia europaea (CN)	4x	1000	Yes	Jingtai	the People's Republic of China	Jingtai	Jingtai	-20	6	38	36	37.3992	104.05	7.72	4.96	N/A	7.81	6.72	N/A	-	NA	Wild
SalD_339	Salicornia europaea (CN)	4x	1000	Yes	Jingtai	the People's Republic of China	Jingtai	Jingtai	-20	6	38	36	38.8219	100.999	7.72	4.96	N/A	7.81	6.72	N/A	-	NA	Wild
SalD_34	Salicornia persica ssp. iranica (KSA)	2x	NA	Yes	QL-3	Kingdom of Saudi Arabia	Qassim, Qassim-Aushazia lake	Al Mithnab	18	19	45	34	26.0623	44.1414	8.7	10.8	22	8.1	55.5	12	-	228-7	Wild
SalD_341	Salicornia europaea (CN)	4x	1000	Yes	Jingtai	the People's Republic of China	Jingtai	Jingtai	-20	6	38	36	38.6181	101.065	7.72	4.96	N/A	7.81	6.72	N/A	-	NA	Wild
SalD_35	Salicornia persica ssp. iranica (KSA)	2x	NA	Yes	QL-3	Kingdom of Saudi Arabia	Qassim, Qassim-Aushazia lake	Al Mithnab	18	19	45	34	26.0623	44.1414	8.7	10.8	22	8.1	55.5	12	-	235-4	Wild
SalD_36	Salicornia persica ssp. iranica (KSA)	2x	NA	Yes	QL-3	Kingdom of Saudi Arabia	Qassim, Qassim-Aushazia lake	Al Mithnab	18	19	45	34	26.0623	44.1414	8.7	10.8	22	8.1	55.5	12	-	236-7	Wild
SalD_37	Salicornia persica ssp. iranica (KSA)	2x	NA	Yes	QL-3	Kingdom of Saudi Arabia	Qassim, Qassim-Aushazia lake	Al Mithnab	18	19	45	34	26.0623	44.1414	8.7	10.8	22	8.1	55.5	12	KAUST1361	237-7	Wild
SalD_38	Salicornia persica ssp. iranica (KSA)	2x	NA	Yes	QL-3	Kingdom of Saudi Arabia	Qassim, Qassim-Aushazia lake	Al Mithnab	18	19	45	34	26.0623	44.1414	8.7	10.8	22	8.1	55.5	12	KAUST1362	238-1	KAUST238
SalD_39	Salicornia persica ssp. iranica (KSA)	2x	NA	Yes	QL-1	Kingdom of Saudi Arabia	Qassim, Qassim-Aushazia lake	Al Mithnab	18	19	45	34	25.9886	44.1798	8.7	10.8	8.8	8.1	55.5	12	KAUST1363	271-8	Wild
SalD_40	Salicornia persica ssp. iranica (KSA)	2x	580	Yes	QL-1	Kingdom of Saudi Arabia	Qassim, Qassim-Aushazia lake	Al Mithnab	18	19	45	34	25.9886	44.1798	8.7	10.8	8.8	8.1	55.5	12	KAUST1146	424-1	KAUST424	Sibling
SalD_41	Salicornia europaea (IS)	2x	NA	No	Jacob Blaustein Institute for Desert Research (BIDR)	Israel	Dead Sea region	Neve Zohar	10	16	38	26	30.9723	35.3619	7.5	N/A	4.6	6	160	27.9	KAUST1376	428-5	KAUST428		https://doi.org/10.1016/S0723-2020(11)80402-9
SalD_42	Salicornia europaea (IS)	2x	NA	No	Jacob Blaustein Institute for Desert Research (BIDR)	Israel	Dead Sea region	Neve Zohar	10	16	38	26	30.9723	35.3619	7.5	N/A	4.6	6	160	27.9	KAUST1408	443-8	KAUST3		https://doi.org/10.1016/S0723-2020(11)80402-9
SalD_424	Salicornia persica ssp. iranica (KSA)	2x	580	Yes	QL-1	Kingdom of Saudi Arabia	Qassim, Qassim-Aushazia lake	Al Mithnab	18	19	45	34	25.9886	44.1798	8.7	10.8	8.8	8.1	55.5	12	KAUST1146	424-1	KAUST424	Sibling
SalD_43	Salicornia europaea (IS)	2x	580	No	Jacob Blaustein Institute for Desert Research (BIDR)	Israel	Dead Sea region	Neve Zohar	10	16	38	26	30.9723	35.3619	7.5	N/A	4.6	6	160	27.9	KAUST1409	446-5	KAUST3	Offspring	https://doi.org/10.1016/S0723-2020(11)80402-9
SalD_44	Salicornia europaea (IS)	2x	NA	No	Jacob Blaustein Institute for Desert Research (BIDR)	Israel	Dead Sea region	Neve Zohar	10	16	38	26	30.9723	35.3619	7.5	N/A	4.6	6	160	27.9	KAUST1410	448-1	KAUST3		https://doi.org/10.1016/S0723-2020(11)80402-9
SalD_45	Salicornia europaea (IS)	2x	NA	No	Jacob Blaustein Institute for Desert Research (BIDR)	Israel	Dead Sea region	Neve Zohar	10	16	38	26	30.9723	35.3619	7.5	N/A	4.6	6	160	27.9	KAUST1411	449-4	KAUST449		https://doi.org/10.1016/S0723-2020(11)80402-9
SalD_46	Salicornia europaea (IS)	2x	NA	No	Jacob Blaustein Institute for Desert Research (BIDR)	Israel	Dead Sea region	Neve Zohar	10	16	38	26	30.9723	35.3619	7.5	N/A	4.6	6	160	27.9	KAUST1415	450-6	KAUST450		https://doi.org/10.1016/S0723-2020(11)80402-9
SalD_47	Salicornia brachiata (IN)	2x	553	Yes	Gujarat-Bhavnagar	India	Gujarat-Bhavnagar	Bhavnagar		16		38	21.7918	72.2338	8	1.8-9.6	N/A	N/A	N/A	N/A	KAUST1416	462-4	KAUST22	Offspring
SalD_48	Salicornia europaea (IS)	2x	NA	No	Jacob Blaustein Institute for Desert Research (BIDR)	Israel	Dead Sea region	Neve Zohar	10	16	38	26	30.9723	35.3619	7.5	N/A	4.6	6	160	27.9	-	617-6	KAUST3		https://doi.org/10.1016/S0723-2020(11)80402-9
SalD_49	Salicornia europaea (IS)	2x	NA	No	Jacob Blaustein Institute for Desert Research (BIDR)	Israel	Dead Sea region	Neve Zohar	10	16	38	26	30.9723	35.3619	7.5	N/A	4.6	6	160	27.9	-	621-9	KAUST3		https://doi.org/10.1016/S0723-2020(11)80402-9
SalD_51	Salicornia europaea (IS)	2x	NA	No	Jacob Blaustein Institute for Desert Research (BIDR)	Israel	Dead Sea region	Neve Zohar	10	16	38	26	30.9723	35.3619	7.5	N/A	4.6	6	160	27.9	KAUST1566	742-1	KAUST742		https://doi.org/10.1016/S0723-2020(11)80402-9
SalD_52	Salicornia europaea (IS)	2x	NA	No	Jacob Blaustein Institute for Desert Research (BIDR)	Israel	Dead Sea region	Neve Zohar	10	16	38	26	30.9723	35.3619	7.5	N/A	4.6	6	160	27.9	KAUST1575	743-1	KAUST743		https://doi.org/10.1016/S0723-2020(11)80402-9
SalD_53	Salicornia europaea (IS)	2x	NA	No	Jacob Blaustein Institute for Desert Research (BIDR)	Israel	Dead Sea region	Neve Zohar	10	16	38	26	30.9723	35.3619	7.5	N/A	4.6	6	160	27.9	-	744-4	KAUST3		https://doi.org/10.1016/S0723-2020(11)80402-9
SalD_54	Salicornia europaea (IS)	2x	NA	No	Jacob Blaustein Institute for Desert Research (BIDR)	Israel	Dead Sea region	Neve Zohar	10	16	38	26	30.9723	35.3619	7.5	N/A	4.6	6	160	27.9	KAUST1588	745-6	KAUST745		https://doi.org/10.1016/S0723-2020(11)80402-9
SalD_55	Salicornia europaea (IS)	2x	NA	No	Jacob Blaustein Institute for Desert Research (BIDR)	Israel	Dead Sea region	Neve Zohar	10	16	38	26	30.9723	35.3619	7.5	N/A	4.6	6	160	27.9	KAUST1592	746-1	KAUST3		https://doi.org/10.1016/S0723-2020(11)80402-9
SalD_57	Salicornia sinus-persica (KSA)	2x	NA	Yes	Tarout Island	Kingdom of Saudi Arabia	Tarout Island	Tarout	11	18	43	33	26.5913	50.0465	8.7	9.2	14.9	8.1	50	14.9	KAUST1605	758-6	KAUST758
SalD_59	Salicornia sinus-persica (KSA)	2x	NA	Yes	Tarout Island	Kingdom of Saudi Arabia	Tarout Island	Tarout	11	18	43	33	26.5913	50.0465	8.7	9.2	14.9	8.1	50	14.9	-	760-5	KAUST268
SalD_60	Salicornia persica ssp. iranica (KSA)	2x	NA	Yes	QL-1	Kingdom of Saudi Arabia	Qassim, Qassim-Aushazia lake	Al Mithnab	18	19	45	34	25.9886	44.1798	8.7	10.8	8.8	8.1	55.5	12	KAUST1619	761-1	KAUST761
SalD_61	Salicornia persica ssp. iranica (KSA)	2x	NA	Yes	QL-1	Kingdom of Saudi Arabia	Qassim, Qassim-Aushazia lake	Al Mithnab	18	19	45	34	25.9886	44.1798	8.7	10.8	8.8	8.1	55.5	12	KAUST1621	855-7	KAUST184
SalD_62	Salicornia persica ssp. iranica (KSA)	2x	NA	Yes	QL-3	Kingdom of Saudi Arabia	Qassim, Qassim-Aushazia lake	Al Mithnab	18	19	45	34	26.0623	44.1414	8.7	10.8	22	8.1	55.5	12	KAUST1626	856-1	KAUST856
SalD_64	Salicornia persica ssp. iranica (KSA)	2x	NA	Yes	QL-3	Kingdom of Saudi Arabia	Qassim, Qassim-Aushazia lake	Al Mithnab	18	19	45	34	26.0623	44.1414	8.7	10.8	22	8.1	55.5	12	KAUST1640	858-4	KAUST858
SalD_65	Salicornia persica ssp. iranica (KSA)	2x	580	Yes	QL-3	Kingdom of Saudi Arabia	Qassim, Qassim-Aushazia lake	Al Mithnab	18	19	45	34	26.0623	44.1414	8.7	10.8	22	8.1	55.5	12	KAUST1644	859-2	KAUST859
SalD_66	Salicornia sinus-persica (KSA)	2x	NA	Yes	Tarout Island	Kingdom of Saudi Arabia	Tarout Island	Tarout	11	18	43	33	26.5913	50.0465	8.7	9.2	14.9	8.1	50	14.9	KAUST1646	860-2	KAUST860
SalD_667_5	Salicornia species (ROK)	4x	2357	Yes	Jeollanam-do	Republic of Korea	Jeollanam-do	Jido		-9		29	35.0414	126.187	6.9	10.1	N/A	7.6	41.8	N/A	KAUST1297	667-5	KAUST8	Mother plant
SalD_67	Salicornia sinus-persica (KSA)	2x	NA	Yes	Tarout Island	Kingdom of Saudi Arabia	Tarout Island	Tarout	11	18	43	33	26.5913	50.0465	8.7	9.2	14.9	8.1	50	14.9	KAUST1657	861-6	KAUST244
SalD_68	Salicornia sinus-persica (KSA)	2x	NA	Yes	Tarout Island	Kingdom of Saudi Arabia	Tarout Island	Tarout	11	18	43	33	26.5913	50.0465	8.7	9.2	14.9	8.1	50	14.9	KAUST1661	862-3	KAUST862
SalD_69	Salicornia sinus-persica (KSA)	2x	NA	Yes	Tarout Island	Kingdom of Saudi Arabia	Tarout Island	Tarout	11	18	43	33	26.5913	50.0465	8.7	9.2	14.9	8.1	50	14.9	KAUST1671	863-5	KAUST247
SalD_70	Salicornia sinus-persica (KSA)	2x	NA	Yes	Tarout Island	Kingdom of Saudi Arabia	Tarout Island	Tarout	11	18	43	33	26.5913	50.0465	8.7	9.2	14.9	8.1	50	14.9	KAUST1679	864-7	KAUST864
SalD_71	Salicornia sinus-persica (KSA)	2x	NA	Yes	Tarout Island	Kingdom of Saudi Arabia	Tarout Island	Tarout	11	18	43	33	26.5913	50.0465	8.7	9.2	14.9	8.1	50	14.9	KAUST1687	865-8	KAUST865
SalD_72	Salicornia sinus-persica (KSA)	2x	NA	Yes	Tarout Island	Kingdom of Saudi Arabia	Tarout Island	Tarout	11	18	43	33	26.5913	50.0465	8.7	9.2	14.9	8.1	50	14.9	KAUST1692	866-9	KAUST248
SalD_73	Salicornia sinus-persica (KSA)	2x	NA	Yes	Tarout Island	Kingdom of Saudi Arabia	Tarout Island	Tarout	11	18	43	33	26.5913	50.0465	8.7	9.2	14.9	8.1	50	14.9	-	867-7	KAUST248
SalD_74	Salicornia sinus-persica (KSA)	2x	NA	Yes	Tarout Island	Kingdom of Saudi Arabia	Tarout Island	Tarout	11	18	43	33	26.5913	50.0465	8.7	9.2	14.9	8.1	50	14.9	KAUST1702	867-7	KAUST248
SalD_75	Salicornia sinus-persica (KSA)	2x	NA	Yes	Tarout Island	Kingdom of Saudi Arabia	Tarout Island	Tarout	11	18	43	33	26.5913	50.0465	8.7	9.2	14.9	8.1	50	14.9	-	868-7	KAUST250
SalD_76	Salicornia sinus-persica (KSA)	2x	NA	Yes	Tarout Island	Kingdom of Saudi Arabia	Tarout Island	Tarout	11	18	43	33	26.5913	50.0465	8.7	9.2	14.9	8.1	50	14.9	KAUST1713	869-4	KAUST869
SalD_77	Salicornia sinus-persica (KSA)	2x	NA	Yes	Tarout Island	Kingdom of Saudi Arabia	Tarout Island	Tarout	11	18	43	33	26.5913	50.0465	8.7	9.2	14.9	8.1	50	14.9	KAUST1718	870-2	KAUST251
SalD_78	Salicornia sinus-persica (KSA)	2x	NA	Yes	Tarout Island	Kingdom of Saudi Arabia	Tarout Island	Tarout	11	18	43	33	26.5913	50.0465	8.7	9.2	14.9	8.1	50	14.9	-	871-8	KAUST266	Sibling
SalD_79	Salicornia sinus-persica (KSA)	2x	NA	Yes	Tarout Island	Kingdom of Saudi Arabia	Tarout Island	Tarout	11	18	43	33	26.5913	50.0465	8.7	9.2	14.9	8.1	50	14.9	-	875-9	KAUST178
SalD_80	Salicornia persica ssp. iranica (KSA)	2x	NA	Yes	QL-1	Kingdom of Saudi Arabia	Qassim, Qassim-Aushazia lake	Al Mithnab	18	19	45	34	25.9886	44.1798	8.7	10.8	8.8	8.1	55.5	12	KAUST1736	878-1	KAUST878
SalD_81	Salicornia persica ssp. iranica (KSA)	2x	NA	Yes	QL-2	Kingdom of Saudi Arabia	Qassim, Qassim-Aushazia lake	Al Mithnab	18	19	45	34	25.9537	44.2017	8.7	10.8	8.9	8.1	55.5	12	-	879-1	KAUST186
SalD_82	Salicornia persica ssp. iranica (KSA)	2x	NA	Yes	QL-2	Kingdom of Saudi Arabia	Qassim, Qassim-Aushazia lake	Al Mithnab	18	19	45	34	25.9537	44.2017	8.7	10.8	8.9	8.1	55.5	12	KAUST1743	880-1	KAUST186
SalD_83b	Salicornia persica ssp. iranica (KSA)	2x	NA	Yes	QL-2	Kingdom of Saudi Arabia	Qassim, Qassim-Aushazia lake	Al Mithnab	18	19	45	34	25.9537	44.2017	8.7	10.8	8.9	8.1	55.5	12	KAUST1747	882-2	KAUST882
SalD_84	Salicornia persica ssp. iranica (KSA)	2x	NA	Yes	QL-2	Kingdom of Saudi Arabia	Qassim, Qassim-Aushazia lake	Al Mithnab	18	19	45	34	25.9537	44.2017	8.7	10.8	8.9	8.1	55.5	12	-	883-1	KAUST188
SalD_85	Salicornia persica ssp. iranica (KSA)	2x	NA	Yes	QL-2	Kingdom of Saudi Arabia	Qassim, Qassim-Aushazia lake	Al Mithnab	18	19	45	34	25.9537	44.2017	8.7	10.8	8.9	8.1	55.5	12	-	884-1	KAUST188
SalD_86	Salicornia persica ssp. iranica (KSA)	2x	NA	Yes	QL-2	Kingdom of Saudi Arabia	Qassim, Qassim-Aushazia lake	Al Mithnab	18	19	45	34	25.9537	44.2017	8.7	10.8	8.9	8.1	55.5	12	KAUST1756	885-1	KAUST885
SalD_87	Salicornia persica ssp. iranica (KSA)	2x	NA	Yes	QL-2	Kingdom of Saudi Arabia	Qassim, Qassim-Aushazia lake	Al Mithnab	18	19	45	34	25.9537	44.2017	8.7	10.8	8.9	8.1	55.5	12	-	886-1	KAUST189
SalD_871_3	Salicornia sinus-persica (KSA)	2x	577	Yes	Tarout Island	Kingdom of Saudi Arabia	Tarout Island	Tarout	11	18	43	33	26.5913	50.0465	8.7	9.2	14.9	8.1	50	14.9	KAUST1973	871-3	KAUST266	Mother plant
SalD_88	Salicornia persica ssp. iranica (KSA)	2x	NA	Yes	QL-2	Kingdom of Saudi Arabia	Qassim, Qassim-Aushazia lake	Al Mithnab	18	19	45	34	25.9537	44.2017	8.7	10.8	8.9	8.1	55.5	12	KAUST1763	888-2	KAUST888
SalD_89	Salicornia persica ssp. iranica (KSA)	2x	NA	Yes	QL-3	Kingdom of Saudi Arabia	Qassim, Qassim-Aushazia lake	Al Mithnab	18	19	45	34	26.0623	44.1414	8.7	10.8	22	8.1	55.5	12	KAUST1770	889-1	KAUST889
SalD_90	Salicornia persica ssp. iranica (KSA)	2x	NA	Yes	QL-1	Kingdom of Saudi Arabia	Qassim, Qassim-Aushazia lake	Al Mithnab	18	19	45	34	25.9886	44.1798	8.7	10.8	8.8	8.1	55.5	12	KAUST1778	932-1	KAUST162
SalD_91	Salicornia persica ssp. iranica (KSA)	2x	NA	Yes	QL-1	Kingdom of Saudi Arabia	Qassim, Qassim-Aushazia lake	Al Mithnab	18	19	45	34	25.9886	44.1798	8.7	10.8	8.8	8.1	55.5	12	-	937-1	KAUST182
SalD_92	Salicornia persica ssp. iranica (KSA)	2x	NA	Yes	QL-2	Kingdom of Saudi Arabia	Qassim, Qassim-Aushazia lake	Al Mithnab	18	19	45	34	25.9537	44.2017	8.7	10.8	8.9	8.1	55.5	12	KAUST1785	939-1	KAUST939
SalD_93	Salicornia persica ssp. iranica (KSA)	2x	NA	Yes	QL-3	Kingdom of Saudi Arabia	Qassim, Qassim-Aushazia lake	Al Mithnab	18	19	45	34	26.0623	44.1414	8.7	10.8	22	8.1	55.5	12	-	954-4	KAUST210
SalD_94	Salicornia persica ssp. iranica (KSA)	2x	NA	Yes	QL-3	Kingdom of Saudi Arabia	Qassim, Qassim-Aushazia lake	Al Mithnab	18	19	45	34	26.0623	44.1414	8.7	10.8	22	8.1	55.5	12	KAUST1796	971-1	KAUST971
SalD_95	Salicornia persica ssp. iranica (KSA)	2x	NA	Yes	QL-3	Kingdom of Saudi Arabia	Qassim, Qassim-Aushazia lake	Al Mithnab	18	19	45	34	26.0623	44.1414	8.7	10.8	22	8.1	55.5	12	-	977-2	KAUST228
SalD_96	Salicornia persica ssp. iranica (KSA)	2x	NA	Yes	QL-3	Kingdom of Saudi Arabia	Qassim, Qassim-Aushazia lake	Al Mithnab	18	19	45	34	26.0623	44.1414	8.7	10.8	22	8.1	55.5	12	-	995-1	KAUST236
SalD_97	Salicornia persica ssp. iranica (KSA)	2x	NA	Yes	QL-3	Kingdom of Saudi Arabia	Qassim, Qassim-Aushazia lake	Al Mithnab	18	19	45	34	26.0623	44.1414	8.7	10.8	22	8.1	55.5	12	-	996-5	KAUST225
SalD_98	Salicornia europaea (FR)	4x	NA	Yes	Etang de Thau	France	Etang de Thau	Marseillan	-7	5	32	31	43.3305	3.54487	8.7	23.9	N/A	7.64	63	N/A	-	1095-1	KAUST1095	Offspring
SalD_99	Salicornia europaea (FR)	4x	NA	Yes	Etang de Thau	France	Etang de Thau	Marseillan	-7	5	32	31	43.3305	3.54487	8.7	23.9	N/A	7.64	63	N/A	KAUST1266	826-9	Wild

## Sheet:  Supplementary Table 7
Supplementary Table 7. Differentially expressed genes uniquely detected in S. bigelovii.
GeneID	Description
SaBi20611	Belongs to the cytochrome P450 family
SaBi28820	WRKY Transcription Factor
SaBi38266	May be involved in both secretory and endocytic intracellular trafficking in the endosomal prevacuolar compartments
SaBi31904	MADS
SaBi39225	Zinc finger Ran-binding domain-containing protein 2-like
SaBi31215	Polygalacturonase-like
SaBi17548	Belongs to the 'GDSL' lipolytic enzyme family
SaBi34266	Belongs to the AAA ATPase family
SaBi23928	acyl-activating enzyme
SaBi16400	transcription factor
SaBi13992
SaBi12231	VQ motif-containing protein
SaBi27336	Belongs to the glycosyl hydrolase 18 family
SaBi25224	Belongs to the glycosyl hydrolase 17 family
SaBi35274	(NAC) domain-containing protein
SaBi01911	zinc transporter
SaBi02049	superfamily. Protein
SaBi20403
SaBi34363	Sigma factor binding protein
SaBi16447
SaBi35748	glycerol-3-phosphate acyltransferase
SaBi01072	Egg cell-secreted protein
SaBi03691	BNR Asp-box repeat family protein
SaBi13739	pumilio homolog
SaBi20333	Belongs to the protein kinase superfamily. Ser Thr protein kinase family
SaBi01023	Belongs to the iron ascorbate-dependent oxidoreductase family
SaBi26940	Plant lipoxygenase may be involved in a number of diverse aspects of plant physiology including growth and development, pest resistance, and senescence or responses to wounding
SaBi28360	glutathione s-transferase
SaBi01594
SaBi17765	Belongs to the peroxidase family. Classical plant (class III) peroxidase subfamily
SaBi23889	Pentatricopeptide repeat-containing protein
SaBi01468	Belongs to the helicase family
SaBi10890	Zinc finger protein CONSTANS-like
SaBi12169	Long cell-linked locus protein
SaBi00304	Heat Stress Transcription Factor
SaBi08206	Belongs to the glycosyl hydrolase 18 family
SaBi34292	transposition, RNA-mediated
SaBi13110	Belongs to the chalcone stilbene synthases family
SaBi00033	RING-H2 finger protein
SaBi05935	Encoded by
SaBi12860	Polyamine oxidase
SaBi08231	transcription factor
SaBi38877	Belongs to the iron ascorbate-dependent oxidoreductase family
SaBi20409	Catalyzes the reduction of fatty acyl-CoA to fatty alcohols
SaBi10740	Nitrate transporter
SaBi07560
SaBi04719	Belongs to the alternative oxidase family
SaBi12258	helix loop helix domain
SaBi07502	Belongs to the disease resistance NB-LRR family
SaBi05288	zinc transporter
SaBi10842	LRR receptor-like serine threonine-protein kinase
SaBi17757	Non-specific serine threonine protein kinase
SaBi01869	Avr9 Cf-9 rapidly elicited protein
SaBi20574	Ras-related protein
SaBi39341	Cysteine-rich receptor-like protein kinase
SaBi35595	BURP domain-containing protein
SaBi24773	superfamily protein
SaBi05671	Organ-specific protein
SaBi06315	Belongs to the syntaxin family
SaBi01826	G-type lectin S-receptor-like serine threonine-protein kinase
SaBi25007
SaBi40147	Zinc finger protein CONSTANS-like
SaBi20370	Werner syndrome-like exonuclease
SaBi34261	Belongs to the AAA ATPase family
SaBi38901	Belongs to the MIP aquaporin (TC 1.A.8) family
SaBi10771	Leucine-rich repeat receptor-like serine threonine tyrosine-protein kinase
SaBi35877	Protein EARLY FLOWERING 4-like
SaBi12654	Pentatricopeptide repeat-containing protein
SaBi00792	UDP-sugar transporter
SaBi16871	-
SaBi08495
SaBi01179	polyphenol oxidase
SaBi10754	cytochrome P450
SaBi39039	Agamous-like MADS-box protein
SaBi02623
SaBi07201	alcohol dehydrogenase
SaBi13138	Glutathione S-transferase zeta class-like
SaBi34395	disease resistance
SaBi01678	Secretory protein
SaBi05762	ureide permease
SaBi02207	E3 ubiquitin-protein ligase
SaBi07446	sulfate transporter
SaBi26100	Calmodulin-binding protein
SaBi31095	early light-induced protein
SaBi02329	GABA transporter 1-like
SaBi00065	Tubulin--tyrosine ligase-like protein
SaBi17599	Transcription factor
SaBi38792	Belongs to the peptidase A1 family
SaBi01711	Root cap
SaBi17033	AtCASP,CASP
SaBi24364	galactose
SaBi30494	Belongs to the iron ascorbate-dependent oxidoreductase family
SaBi11773	Purple acid phosphatase
SaBi00494	mitochondrial chaperone
SaBi14150	Belongs to the cytochrome P450 family
SaBi38327
SaBi05968	Belongs to the iron ascorbate-dependent oxidoreductase family
SaBi00110	Belongs to the cytochrome P450 family
SaBi07735	first, biotin carboxylase catalyzes the carboxylation of the carrier protein and then the transcarboxylase transfers the carboxyl group to form malonyl-CoA
SaBi20441	aldo-keto reductase
SaBi40651	Transcription factor
SaBi06385	isoform X1
SaBi12880	Belongs to the cytochrome P450 family
SaBi06391	isoform X1
SaBi17370	Belongs to the small heat shock protein (HSP20) family
SaBi29271	carboxylesterase 15
SaBi00651	Belongs to the formin-like family
SaBi33811	Belongs to the glycosyl hydrolase 31 family
SaBi13481	calcium-binding protein
SaBi07552	-
SaBi24441	histidine-containing
SaBi30642	Endoglucanase
SaBi17608	MLP-like protein
SaBi24696	Protein FAR1-RELATED SEQUENCE 11-like
SaBi17547	Belongs to the 'GDSL' lipolytic enzyme family
SaBi36308	Protein of unknown function (DUF1639)
SaBi25378	Belongs to the plant LTP family
SaBi13792	Belongs to the expansin family
SaBi08426	Myb-like DNA-binding domain
SaBi00888	Belongs to the D-isomer specific 2-hydroxyacid dehydrogenase family
SaBi34399	disease resistance
SaBi25113	Amino-acid permease
SaBi11098	Nuclear transcription factor Y subunit
SaBi01866	avr9 Cf-9 rapidly elicited protein
SaBi20664	Belongs to the UDP-glycosyltransferase family
SaBi02093
SaBi24067	cytochrome c oxidase subunit 3
SaBi06005	-
SaBi38717	-
SaBi36313	phosphatase 2C
SaBi40479	SufE-like protein
SaBi06597	receptor-like protein kinase
SaBi13423	Cyclic nucleotide-gated ion channel 1-like
SaBi07173	B3 domain-containing
SaBi27201	Belongs to the glycosyl hydrolase 32 family
SaBi31060	Belongs to the Ca(2 ) cation antiporter (CaCA) (TC 2.A.19) family
SaBi11327	Glutelin
SaBi42290	disease resistance protein At4g27220
SaBi33298	May be involved in modulation of pathogen defense and leaf cell death
SaBi02081	transmembrane transport
SaBi27071	F-Box protein
SaBi06656	Hippocampus abundant transcript-like protein
SaBi19595	Protein DAMAGED DNA-BINDING
SaBi24068	Subunits I, II and III form the functional core of the enzyme complex
SaBi27239	U-box domain-containing protein
SaBi02482	-
SaBi17845	F-box protein
SaBi33772
SaBi29899	-
SaBi06389	Metal transporter
SaBi12574	-
SaBi17828	nuclease HARBI1
SaBi17828	Myb/SANT-like DNA-binding domain
SaBi15554
SaBi20230	Lysosomal Pro-X
SaBi40660	At5g65660-like
SaBi17559	Plant protein of unknown function (DUF936)
SaBi19687	Tropinone reductase homolog
SaBi00983	Plastocyanin-like domain
SaBi27511	Late embryogenesis abundant protein
SaBi30829	reductase
SaBi18365
SaBi42325	-
SaBi20535	-
SaBi16794	lysM domain receptor-like kinase 4
SaBi27628	Mitochondrial ribosome-associated GTPase
SaBi36084	DSBA-like thioredoxin domain
SaBi05642
SaBi34354
SaBi36094	DUF246 domain-containing protein
SaBi12501	nuclease HARBI1
SaBi09218	Belongs to the sulfotransferase 1 family
SaBi00390	malic enzyme
SaBi00621	Belongs to the peptidase S10 family
SaBi17740	serine threonine-protein kinase
SaBi36259	-
SaBi00669	Cysteine-rich receptor-like protein kinase
SaBi39156	Cyclic nucleotide-gated ion channel 20
SaBi16144	Belongs to the glycosyltransferase 2 family
SaBi06227	Pentatricopeptide repeat-containing protein
SaBi13635	G-type lectin S-receptor-like serine threonine-protein kinase
SaBi36514	-
SaBi02680
SaBi10679	domain-containing protein
SaBi12351	Cation H( ) antiporter
SaBi41141	LRR receptor-like serine threonine-protein kinase
SaBi13025	Belongs to the cyclin family
SaBi00072	copper transporter
SaBi24165	light-dependent short hypocotyls
SaBi42970
SaBi13987	Belongs to the glycosyl hydrolase 5 (cellulase A) family
SaBi14155	ABA/WDS induced protein
SaBi01778	Pentatricopeptide repeat-containing protein At2g03880
SaBi06422	Belongs to the peptidase C1 family
SaBi11532	cationic amino acid transporter
SaBi17805	YLS9-like
SaBi35697	Carboxylesterase
SaBi34584	Pentatricopeptide repeat-containing protein
SaBi08112
SaBi15935	cyclic nucleotide-gated ion channel
SaBi10748	Protein NRT1 PTR FAMILY
SaBi40574	-
SaBi06013	-
SaBi16189	zinc transporter
SaBi13746	Major facilitator superfamily protein
SaBi13461	At4g00950-like
SaBi09867	Pentatricopeptide repeat-containing protein
SaBi20520	metal tolerance protein
SaBi17256	Phosphorylase is an important allosteric enzyme in carbohydrate metabolism. Enzymes from different sources differ in their regulatory mechanisms and in their natural substrates. However, all known phosphorylases share catalytic and structural properties
SaBi06173	RING-H2 finger protein
SaBi40066	RNA polymerase II-associated protein
SaBi13888	At1g28695-like
SaBi24132	transcription
SaBi09911	Phosphatidylinositol N-acetylglucosaminyltransferase subunit Y
SaBi06509	Phosphoglucomutase/phosphomannomutase, alpha/beta/alpha domain II
SaBi40392	Protein of unknown function (DUF3537)
SaBi31522	Pentatricopeptide repeat-containing protein
SaBi10776	Belongs to the peptidase C1 family
SaBi20704	Glycosyltransferase-like
SaBi24741	F-Box protein
SaBi00695	inactive purple acid phosphatase
SaBi13826	Transcription factor
SaBi20527	homeobox-leucine zipper protein
SaBi13303	VIT family
SaBi30562	Protein of unknown function, DUF538
SaBi11526	-
SaBi24553	-
SaBi00855	-
SaBi27423	gamma-irradiation and mitomycin c induced
SaBi33215	Protein FANTASTIC FOUR
SaBi30475	Carboxylesterase
SaBi02284	Ras-related protein
SaBi40426	RING-H2 finger protein ATL47-like
SaBi04152	Telomerase Cajal body protein
SaBi02478	dnaJ homolog 1
SaBi02541	Belongs to the tetraspanin (TM4SF) family
SaBi38977	U-box domain-containing protein
SaBi01895	isoform X1
SaBi16134	Belongs to the FPP GGPP synthase family
SaBi02776	Belongs to the major facilitator superfamily. Sugar transporter (TC 2.A.1.1) family
SaBi02624	Hippocampus abundant transcript-like protein
SaBi06585	Class I glutamine amidotransferase-like superfamily protein
SaBi01494	glutamine amidotransferase
SaBi33282	Plant lipoxygenase may be involved in a number of diverse aspects of plant physiology including growth and development, pest resistance, and senescence or responses to wounding
SaBi12650	NAC transcription factor
SaBi21863	UPF0565 protein C2orf69 homolog
SaBi35896	isoform X1
SaBi30481	Nudix hydrolase
SaBi38965	Domain of unknown function (DUF4228)
SaBi10839	Belongs to the terpene cyclase mutase family
SaBi21613	Ribonuclease H protein
SaBi11290	PAN domain-containing protein
SaBi12286	Boron transporter
SaBi30565
SaBi12811	serine threonine-protein kinase
SaBi00338	proteinaceous RNase P 1, chloroplastic mitochondrial-like
SaBi35892	N-(5'-phosphoribosyl)anthranilate isomerase
SaBi33085	Performs the first committed step in the biosynthesis of isoprene-containing compounds such as sterols and terpenoids
SaBi10900	lysosomal thiol
SaBi07716	-
SaBi16027	cytochrome c oxidase copper
SaBi01502	galactose-1-phosphate
SaBi06674	mizu-kussei
SaBi08010	Pseudouridine synthase
SaBi12991	Prp19/Pso4-like
SaBi11220	PLATZ transcription factor family protein
SaBi05442	Belongs to the terpene synthase family
SaBi12359	glutathione s-transferase
SaBi08946	-
SaBi34171	cyclic nucleotide-gated ion channel
SaBi35193	Ring finger
SaBi15683	LRR receptor-like serine threonine-protein kinase
SaBi00380	ethylene-responsive transcription factor
SaBi04748	F-Box protein
SaBi35465	membrane-associated kinase regulator 4
SaBi10668	LON peptidase N-terminal domain and RING finger protein
SaBi40737	Protein NRT1 PTR FAMILY
SaBi06054	Protein NRT1 PTR FAMILY
SaBi05917	Monoacylglycerol lipase
SaBi12148	Pentatricopeptide repeat-containing protein
SaBi30331	zinc-finger of the FCS-type, C2-C2
SaBi40194
SaBi06370
SaBi07426	Cleavage and polyadenylation specificity factor
SaBi39983	Methionine S-methyltransferase
SaBi17649	Auxin Efflux Carrier family protein
SaBi38888	subtilisin-like protease
SaBi26697	Glycerol-3-phosphate dehydrogenase (NAD
SaBi25364	Casein Kinase
SaBi30908	IQ-domain
SaBi15433	Indole-3-acetic acid-induced protein
SaBi20405	Belongs to the sulfotransferase 1 family
SaBi10492	Cysteine-rich receptor-like protein kinase
SaBi20586
SaBi37279	Elongator complex protein
SaBi35414	-
SaBi11109	isoform X1
SaBi35853	-
SaBi40070	Domain of unknown function (DUF4228)
SaBi41590	GRF zinc finger
SaBi34897	Homeobox-leucine zipper protein
SaBi11370	Pentatricopeptide repeat-containing protein At1g77360
SaBi12398	Proton-conducting membrane transporter
SaBi12398	Core subunit of the mitochondrial membrane respiratory chain NADH dehydrogenase (Complex I) that is believed to belong to the minimal assembly required for catalysis. Complex I functions in the transfer of electrons from NADH to the respiratory chain. The immediate electron acceptor for the enzyme is believed to be ubiquinone (By similarity)
SaBi30610	Auxin response factors (ARFs) are transcriptional factors that bind specifically to the DNA sequence 5'-TGTCTC-3' found in the auxin-responsive promoter elements (AuxREs)
SaBi30632	-
SaBi07930	Protein kinase C conserved region 2 (CalB)
SaBi01002	G-type lectin S-receptor-like serine threonine-protein kinase
SaBi29115	transmembrane protein 64-like
SaBi18892	Hemerythrin HHE cation binding domain
SaBi03540
SaBi21104	protease
SaBi26741	Copper-transporting ATPase
SaBi06075	Belongs to the AAA ATPase family
SaBi30420	Hydrolyzes acetyl esters in homogalacturonan regions of pectin. In type I primary cell wall, galacturonic acid residues of pectin can be acetylated at the O-2 and O-3 positions. Decreasing the degree of acetylation of pectin gels in vitro alters their physical properties
SaBi13217	U-box domain-containing protein
SaBi10894	Transcription initiation factor TFIID subunit
SaBi17697	lung seven transmembrane receptor family protein
SaBi22514	UDP-galactose UDP-glucose transporter
SaBi30664
SaBi35318	Belongs to the glycosyl hydrolase 17 family
SaBi11542	cationic amino acid transporter
SaBi13167	growth-regulating factor
SaBi35210	Pentatricopeptide repeat-containing protein
SaBi12732	Acyl-coenzyme A thioesterase 9
SaBi12517	dof zinc finger protein
SaBi17244	transcription factor
SaBi12890	disease resistance
SaBi27736	DNAJ heat shock N-terminal domain-containing protein
SaBi10654	Belongs to the NPH3 family
SaBi20298	transcription factor
SaBi38957	BEST Arabidopsis thaliana protein match is Protein of
SaBi02202	Transcription factor
SaBi30926	DNA-dependent RNA polymerase catalyzes the transcription of DNA into RNA using the four ribonucleoside triphosphates as substrates
SaBi33477	Removal of H(2)O(2), oxidation of toxic reductants, biosynthesis and degradation of lignin, suberization, auxin catabolism, response to environmental stresses such as wounding, pathogen attack and oxidative stress
SaBi16009	histone acetyl-transferase
SaBi30402	Pentatricopeptide repeat-containing protein
SaBi17224	Tetratricopeptide repeat (TPR)-like superfamily protein
SaBi30298	tobamovirus multiplication protein
SaBi21113	mitogen-activated protein kinase
SaBi30047	ASCH domain
SaBi13778	Vesicle-associated protein
SaBi25142	zinc finger CCCH domain-containing protein
SaBi25998	Dr1-associated
SaBi38969	dof zinc finger protein
SaBi09616	serine threonine-protein kinase
SaBi12493	ABC transporter B family member
SaBi07851	UDP-glucoronosyl and UDP-glucosyl transferase
SaBi19603	Aspartic proteinase CDR1-like
SaBi30223	membrane protein At4g09580
SaBi12804	Tryptophan aminotransferase-related protein
SaBi37084	Non-specific serine threonine protein kinase
SaBi12216	Histone-lysine n-methyltransferase
SaBi11553	2-aminoethanethiol
SaBi13316	MADS-box protein
SaBi38975	transcription factor
SaBi17749	Pullulanase 1
SaBi11417	E3 ubiquitin-protein ligase
SaBi12463	Activating signal cointegrator 1 complex subunit
SaBi13311	Spinocerebellar ataxia type 10 protein domain
SaBi17332	Belongs to the GRAS family
SaBi24490	DNA excision repair protein
SaBi06586	Protein of unknown function (DUF789)
SaBi31085	transcription factor
SaBi10538	Belongs to the protein kinase superfamily. Ser Thr protein kinase family
SaBi20954	ABC transporter transmembrane region
SaBi42293	RNA pseudouridine synthase 6
SaBi17915	ABC transporter I family member
SaBi17008	zinc finger CCCH domain-containing protein
SaBi39478	Belongs to the TPP enzyme family
SaBi36045	At1g66480-like
SaBi00158	CDK-activating kinase assembly factor MAT1
SaBi12323	meiotic cell cycle
SaBi16086	belongs to the uridine kinase family
SaBi35693	E3 ubiquitin-protein ligase
SaBi26890	RNA polymerase II subunit 5-mediating protein homolog
SaBi00607	K( ) efflux antiporter
SaBi30226	-
SaBi05774	Asparagine synthetase domain-containing protein
SaBi19190	metal tolerance protein
SaBi35436	dihydropyrimidine dehydrogenase
SaBi27315	Pentatricopeptide repeat-containing protein
SaBi35373	zinc finger CCCH domain-containing protein
SaBi07856	Cinnamoyl-CoA reductase
SaBi12413	-
SaBi25327	Zinc finger CCCH domain-containing protein
SaBi06679	3'-5'-exoribonuclease activity
SaBi01902	Transcription factor bHLH68-like
SaBi16384	Belongs to the 'GDSL' lipolytic enzyme family
SaBi15043	GPN-loop GTPase 1 homolog
SaBi10843	U-box domain-containing protein
SaBi34185	CSC1-like protein
SaBi00253	E3 ubiquitin-protein ligase At1g63170-like
SaBi00979	BAG family molecular chaperone regulator 5
SaBi33264	Lactoylglutathione lyase
SaBi30418	Pentatricopeptide repeat-containing protein At4g19440
SaBi31629	Tetratricopeptide repeat protein
SaBi20559	CDK5RAP3-like protein
SaBi01846	PolyA polymerase
SaBi05795	Universal stress protein
SaBi17198	nudC domain-containing protein
SaBi31339	Homeobox-leucine zipper protein
SaBi34507	isoform X1
SaBi32390	endonuclease activity
SaBi17564	chromatin binding
SaBi39205	-
SaBi03539
SaBi36095	Phosphatidylinositol 4-kinase
SaBi13263	Acyclic terpene utilisation family protein AtuA
SaBi01248	Transmembrane protein 184C-like
SaBi16278	BPI LBP family protein
SaBi20597	May act as a component of the auxin efflux carrier
SaBi12803	Belongs to the adaptor complexes medium subunit family
SaBi40745
SaBi16754	Bifunctional 3-dehydroquinate dehydratase shikimate dehydrogenase
SaBi24082	DNA repair protein XRCC2 homolog
SaBi30332	Vacuolar protein sorting-associated protein
SaBi13082	Small glutamine-rich tetratricopeptide repeat-containing protein
SaBi05761	Purple acid phosphatase
SaBi19999	Hydrolase, alpha beta fold family protein
SaBi21273	Pentacotripeptide-repeat region of PRORP
SaBi21273	Pentatricopeptide repeat-containing protein
SaBi35951	SNF2 domain-containing protein CLASSY
SaBi23910	Polyamine oxidase 4
SaBi12482	glycerophosphoryl diester phosphodiesterase
SaBi30733	Protein BYPASS1-related
SaBi10633	Pectate lyase
SaBi14690	Belongs to the disease resistance NB-LRR family
SaBi01979	DNA repair protein
SaBi30589	Belongs to the short-chain dehydrogenases reductases (SDR) family
SaBi06007	transcription factor
SaBi35749	pumilio homolog
SaBi16717	Serine threonine-protein phosphatase 2A regulatory subunit B'' subunit
SaBi34470	alpha-galactosidase
SaBi38143	Zinc phosphodiesterase ELAC protein
SaBi01462	(PB1) domain-containing protein
SaBi00680	Belongs to the helicase family. Dicer subfamily
SaBi13029	chaperone protein
SaBi01793	Belongs to the major facilitator superfamily. Sugar transporter (TC 2.A.1.1) family
SaBi09951	Demethylates proteins that have been reversibly carboxymethylated
SaBi07699	NAC domain-containing protein
SaBi17546	Belongs to the 'GDSL' lipolytic enzyme family
SaBi11357	uridine nucleosidase
SaBi02021	Lys-63-specific deubiquitinase
SaBi20359	Protein kinase and PP2C-like domain-containing
SaBi25104	F-Box protein
SaBi17539	ethylene-responsive transcription factor
SaBi10779	Peptide methionine sulfoxide
SaBi37327	Mitochondrial import inner membrane translocase subunit
SaBi13602	ABC transporter G family member
SaBi07608	Regulator of biological processes that recruits a histone deacetylase to control gene transcription. May play a role in the entry into mitosis, negatively regulating the cell proliferation. Formation of stable complexes with geminiviridae replication-associated proteins may create a cellular environment which favors viral DNA replication
SaBi06757	Trafficking protein particle complex subunit
SaBi38783	Belongs to the peroxisomal membrane protein PXMP2 4 family
SaBi07794	This magnesium-dependent enzyme catalyzes the hydrolysis of ATP coupled with the transport of calcium
SaBi34582	-
SaBi15328	Telomere length regulation protein TEL2 homolog
SaBi14054	Guanine nucleotide-binding protein subunit beta-like protein 1 homolog
SaBi40421	Dihydrofolate synthetase
SaBi34734	of pyruvate dehydrogenase complex
SaBi20356	Cysteine proteinase inhibitor
SaBi01796	Glutamate-gated receptor that probably acts as non- selective cation channel
SaBi13052	superfamily. Protein
SaBi00573	-
SaBi24040	UTP-glucose-1-phosphate uridylyltransferase
SaBi34070	RNA-binding protein
SaBi24793	Cleft lip and palate transmembrane protein
SaBi15586	TAF RNA Polymerase I subunit A
SaBi06777	transcription factor
SaBi14924	Belongs to the glutamine synthetase family
SaBi36105	DNA-dependent RNA polymerase catalyzes the transcription of DNA into RNA using the four ribonucleoside triphosphates as substrates
SaBi31033	F-box protein
SaBi41797	Protein N-lysine methyltransferase
SaBi17871	ABC transporter B family member 29
SaBi06057	isoform X1
SaBi05812	Prolyl oligopeptidase family protein
SaBi00894	Belongs to the Ca(2 ) cation antiporter (CaCA) (TC 2.A.19) family
SaBi02698	Putative peptidoglycan binding domain
SaBi17640	23-bisphosphoglycerate-independent phosphoglycerate mutase
SaBi39104	Katanin p60 ATPase-containing subunit A-like
SaBi02607	Translation initiation factor
SaBi36841	Phd finger protein
SaBi15951	-
SaBi07661	belongs to the HisA HisF family
SaBi17358	U-box domain-containing protein
SaBi07053	callose synthase
SaBi31584	circadian regulation of calcium ion oscillation
SaBi20935	Mediates both low-affinity uptake and efflux of sugar across the membrane
SaBi25094	Belongs to the protein kinase superfamily. Ser Thr protein kinase family
SaBi30590	Alpha-trehalose glucohydrolase
SaBi27677	Major Facilitator Superfamily
SaBi29378	-
SaBi40598	uridine nucleosidase 2
SaBi01946	Protein of unknown function (DUF632)
SaBi06568	Ubiquitin-like superfamily protein
SaBi11259	Pyruvate kinase
SaBi40420	Dihydrofolate synthetase
SaBi28419	peptide chain release factor
SaBi17103	IQ-domain
SaBi24420	Ribosomal L18 of archaea, bacteria, mitoch. and chloroplast
SaBi31296	Belongs to the cyclin family
SaBi06518	isoform X1
SaBi17005	CBS domain-containing protein CBSX3
SaBi36478	EIN3-binding F-box protein
SaBi07736	Origin Recognition Complex subunit
SaBi20607	-
SaBi03712	187-kDa microtubule-associated protein
SaBi08007	Belongs to the helicase family. Dicer subfamily
SaBi24216	May act early in the ethylene signal transduction pathway, possibly as an ethylene receptor, or as a regulator of the pathway
SaBi30592	Mitochondrial import inner membrane translocase subunit Tim17 Tim22 Tim23 family protein
SaBi16005	3-deoxy-manno-octulosonate cytidylyltransferase
SaBi38804	early-responsive to dehydration
SaBi40726	Tetratricopeptide repeat protein
SaBi02748	-
SaBi07826	Protein OSB1, mitochondrial-like
SaBi13289	F-box protein
SaBi07415	Anaphase-promoting complex subunit
SaBi06191	-
SaBi20642	Plays a central role in 2-thiolation of mcm(5)S(2)U at tRNA wobble positions of tRNA(Lys), tRNA(Glu) and tRNA(Gln). May act by forming a heterodimer with NCS6 CTU1 that ligates sulfur from thiocarboxylated URM1 onto the uridine of tRNAs at wobble position
SaBi16901	Tetratricopeptide repeat protein
SaBi02074	Protein FAR1-RELATED SEQUENCE
SaBi24180	belongs to the protein kinase superfamily
SaBi06429	Belongs to the iron ascorbate-dependent oxidoreductase family
SaBi20361	General transcription factor IIH subunit
SaBi11976	phosphatase 2C
SaBi23644	Acyl-CoA dehydrogenase family member
SaBi02266	lanC-like protein GCL2
SaBi39851	mediator of RNA polymerase II transcription subunit
SaBi31407	Catalyzes the formation of formate and 2-keto-4- methylthiobutyrate (KMTB) from 1,2-dihydroxy-3-keto-5- methylthiopentene (DHK-MTPene)
SaBi27042	Belongs to the cytochrome b5 family
SaBi01493	Methylmalonate-semialdehyde dehydrogenase
SaBi12496	Cleavage stimulation factor subunit
SaBi01428	DUF21 domain-containing protein
SaBi05971	Belongs to the PI3 PI4-kinase family
SaBi31043	isoform X1
SaBi31958	-
SaBi31464	RING-type E3 ubiquitin transferase
SaBi30499	-
SaBi31741	ATP-citrate synthase beta chain protein
SaBi40579	Ubiquitin-like-specific protease 1D
SaBi02585	serine threonine-protein kinase
SaBi33288	Kelch-like protein
SaBi31335	RING-H2 finger protein
SaBi40312	Transaldolase
SaBi16297
SaBi11788	Proline-rich spliceosome-associated (PSP) family protein zinc knuckle (CCHC-type) family protein
SaBi31795	-
SaBi39844	Protein VAC14 homolog
SaBi06538	Repressor of RNA polymerase III transcription
SaBi27688	Belongs to the peptidase M24B family
SaBi30799	bromo-adjacent homology (BAH) domain-containing protein
SaBi05371	DNA repair protein
SaBi20724	RPM1-interacting protein 4-like
SaBi00006	Telomere repeat-binding factor
SaBi10701	Belongs to the lyase 1 family. Adenylosuccinate lyase subfamily
SaBi24961	UDP-arabinopyranose mutase
SaBi11142	TSL-kinase interacting protein
SaBi06788	belongs to the protein kinase superfamily
SaBi07607	Regulator of biological processes that recruits a histone deacetylase to control gene transcription. May play a role in the entry into mitosis, negatively regulating the cell proliferation. Formation of stable complexes with geminiviridae replication-associated proteins may create a cellular environment which favors viral DNA replication
SaBi26185	B3 domain-containing protein
SaBi06763	Belongs to the peptidase A1 family
SaBi07975	Enoyl-CoA hydratase 2
SaBi08400	Ubiquitin-like domain-containing CTD phosphatase
SaBi19983	E3 ubiquitin-protein ligase
SaBi03318	Adagio protein
SaBi00078	Inter-alpha-trypsin inhibitor heavy
SaBi13919	Protein SCAI isoform X1
SaBi16784	Spermatogenesis-associated protein
SaBi40324	DNAJ heat shock N-terminal domain-containing protein
SaBi15924	Ubiquitin carboxyl-terminal hydrolase
SaBi24764	atsra1,klk,pir,pir121,pirp,sra1
SaBi17136	aldehyde oxidase
SaBi17261	Ring finger
SaBi23769	-
SaBi35689	domain-containing protein
SaBi31359	-
SaBi35912	GDP-Man Man(3)GlcNAc(2)-PP-Dol
SaBi07524	Lecithin-cholesterol acyltransferase-like 1
SaBi12317	Potassium channel
SaBi16834	Mediates the uptake of pyruvate into mitochondria
SaBi21090	isoform X1
SaBi40586	U4 U6 small nuclear ribonucleoprotein
SaBi26759	THO complex subunit
SaBi13049	protease
SaBi35617	Belongs to the DEAD box helicase family
SaBi15626	Belongs to the TUB family
SaBi13502	CDPK-related kinase
SaBi39274	nuclear protein
SaBi01930	protein disulfide isomerase-like
SaBi30943	FIZZY-related
SaBi24338	5'-3' exoribonuclease
SaBi31843	E3 ubiquitin-protein ligase
SaBi35393	This protein promotes the GTP-dependent binding of aminoacyl-tRNA to the A-site of ribosomes during protein biosynthesis
SaBi12701	Proline-rich nuclear receptor coactivator motif
SaBi00913	Sister chromatid cohesion protein PDS5 homolog
SaBi18396	Belongs to the actin family
SaBi25336	calcium-dependent protein kinase
SaBi13476	Bifunctional fucokinase fucose
SaBi25123	Non-specific serine threonine protein kinase
SaBi07445	ethylene-insensitive protein
SaBi31744	serine threonine-protein kinase
SaBi20272	F-box kelch-repeat protein
SaBi31831	Isoamylase 2
SaBi30403	Belongs to the GPI family
SaBi24390	Vesicle-associated protein
SaBi16248	metal ion binding
SaBi40030	Ring finger
SaBi28778	Belongs to the peptidase M18 family
SaBi02636	CONTAINS InterPro DOMAIN s RNA polymerase II-associated protein 1, C-terminal (InterPro IPR013929), RNA polymerase II-associated protein 1, N-terminal
SaBi27504	Transducin WD40 repeat-like superfamily protein
SaBi21331	E3 ubiquitin-protein ligase
SaBi06294	Flavoprotein (FP) subunit of succinate dehydrogenase (SDH) that is involved in complex II of the mitochondrial electron transport chain and is responsible for transferring electrons from succinate to ubiquinone (coenzyme Q)
SaBi17783	regulation of actin nucleation
SaBi32012	LETM1 and EF-hand domain-containing protein 1
SaBi13429	Beclin-1-like protein
SaBi13582	Multiple C2 and transmembrane domain-containing protein
SaBi12833	Phenylalanine--tRNA ligase alpha subunit
SaBi34728	proline--tRNA ligase
SaBi08756	maturation of SSU-rRNA from tricistronic rRNA transcript (SSU-rRNA, 5.8S rRNA, LSU-rRNA)
SaBi05913	Belongs to the 14-3-3 family
SaBi40262	BAG family molecular chaperone regulator
SaBi24887	Belongs to the eukaryotic ribosomal protein eL38 family
SaBi27177	calcium-binding protein
SaBi25031	Pyrrolidone-carboxylate peptidase
SaBi16110	Serine threonine-protein kinase
SaBi01903	catalytic activity
SaBi07671	Outer envelope pore protein
SaBi38982	La-related protein
SaBi02759	Belongs to the CAP family
SaBi42579	Multiple C2 and transmembrane domain-containing protein
SaBi05972	Belongs to the adaptor complexes small subunit family
SaBi00953	heterogeneous nuclear ribonucleoprotein
SaBi03546	Myb/SANT-like DNA-binding domain
SaBi00124	1-phosphatidylinositol-3-phosphate 5-kinase
SaBi00224	serine-threonine kinase receptor-associated
SaBi00345	-
SaBi20343	R3H domain-containing protein
SaBi31368	Salicylic acid-binding protein
SaBi11438
SaBi34234	2-aminoethanethiol
SaBi08064	Tubulin is the major constituent of microtubules. It binds two moles of GTP, one at an exchangeable site on the beta chain and one at a non-exchangeable site on the alpha chain
SaBi30353	NADH dehydrogenase ubiquinone 1 beta subcomplex subunit 8
SaBi11407	Interactor of constitutive active ROPs
SaBi16211	heterogeneous nuclear ribonucleoprotein
SaBi11893	ADP-ribosylation factor GTPase-activating protein
SaBi11065	Belongs to the nucleosome assembly protein (NAP) family
SaBi06654	Glutamate carboxypeptidase 2
SaBi01375	PAP-specific phosphatase, mitochondrial
SaBi17428	UDP-galactose UDP-glucose transporter
SaBi27673	Belongs to the glycosyltransferase 8 family
SaBi16695	-
SaBi11127	-
SaBi07367	RNA-binding protein
SaBi01068	isoform X1
SaBi31869	belongs to the protein kinase superfamily
SaBi36267	methionyl-tRNA formyltransferase
SaBi35775	Mannose-1-phosphate
SaBi00762	3-beta-hydroxysteroid-Delta(8),Delta(7)-isomerase
SaBi11428	-
SaBi02610	phosphatase 2C
SaBi01876	Nuclear pore complex protein NUP35
SaBi14412	NAD kinase 2
SaBi27081	BAG family molecular chaperone regulator
SaBi01473	Belongs to the heat shock protein 70 family
SaBi31786	2-alkenal reductase (NADP( )-dependent)-like
SaBi17117	fasciclin-like arabinogalactan protein
SaBi06454	RNA-binding protein
SaBi01950	Belongs to the heat shock protein 70 family
SaBi38846	Activator of 90 kDa heat shock protein ATPase homolog
SaBi06503	-
SaBi35939	The H protein shuttles the methylamine group of glycine from the P protein to the T protein
SaBi06993	NADH dehydrogenase ubiquinone 1 beta subcomplex subunit
SaBi35454	Serine arginine-rich splicing factor
SaBi30201	GDP-fucose protein O-fucosyltransferase
SaBi01206	Catalyzes the radical-mediated insertion of two sulfur atoms into the C-6 and C-8 positions of the octanoyl moiety bound to the lipoyl domains of lipoate-dependent enzymes, thereby converting the octanoylated domains into lipoylated derivatives
SaBi06420	Involved in the retrieval of endoplasmic reticulum membrane proteins from the early Golgi compartment
SaBi34369	NADH-ubiquinone oxidoreductase 11 kDa subunit
SaBi36001	Haloacid dehalogenase-like hydrolase
SaBi02147	stromal cell-derived factor 2-like protein
SaBi20599	1-acyl-sn-glycerol-3-phosphate acyltransferase
SaBi00320	belongs to the protein kinase superfamily
SaBi01749	RING-type E3 ubiquitin transferase
SaBi21535	Transcription initiation factor TFIID subunit
SaBi36050	Cytochrome b-c1 complex, subunit
SaBi30697	V-type proton ATPase subunit
SaBi22632	serine threonine-protein kinase
SaBi06183	and Fe(II)-dependent oxygenase superfamily protein
SaBi15702	prefoldin subunit 2
SaBi02769	Ras-related protein
SaBi05748	Transcriptional activator that specifically binds 5'- GATA-3' or 5'-GAT-3' motifs within gene promoters
SaBi35430	TONNEAU 1a-like
SaBi17397	-
SaBi31721
SaBi27372	ATP-dependent zinc metalloprotease FTSH 11 chloroplastic
SaBi14068	Protein ACCUMULATION AND REPLICATION OF CHLOROPLASTS 6
SaBi16121	Transmembrane protein 245-like
SaBi02735	F-Box protein
SaBi02190	transcription
SaBi20723	beta-galactosidase
SaBi10604	YLS9-like
SaBi26754	CSC1-like protein At4g02900
SaBi13278	thioesterase
SaBi07347	Belongs to the glycosyltransferase 2 family. Plant cellulose synthase subfamily
SaBi03339	-
SaBi16201	Transcription termination factor family protein
SaBi16265	GDP-fucose protein O-fucosyltransferase
SaBi21330	Required for maturation of ribosomal RNAs and formation of the large ribosomal subunit
SaBi17029	negative regulation of cytokinin-activated signaling pathway
SaBi13528	The pyruvate dehydrogenase complex catalyzes the overall conversion of pyruvate to acetyl-CoA and CO(2)
SaBi01525	Reversible hydration of carbon dioxide
SaBi03053	-
SaBi30392	Heat shock protein 70 (HSP70)-interacting protein
SaBi15593	TPR repeat-containing thioredoxin
SaBi08071	Alkaline neutral invertase CINV2-like
SaBi40347	REF SRPP-like protein
SaBi21326	Belongs to the class-I aminoacyl-tRNA synthetase family
SaBi13908	Signal-recognition-particle assembly has a crucial role in targeting secretory proteins to the rough endoplasmic reticulum membrane. SRP9 together with SRP14 and the Alu portion of the SRP RNA, constitutes the elongation arrest domain of SRP. The complex of SRP9 and SRP14 is required for SRP RNA binding
SaBi32905	ATP-dependent Clp protease proteolytic
SaBi07350
SaBi40781	UDP-galactose transporter 2-like
SaBi34531	Belongs to the V-ATPase proteolipid subunit family
SaBi40975	Belongs to the mitochondrial carrier (TC 2.A.29) family
SaBi25216	Belongs to the ubiquitin-conjugating enzyme family
SaBi22207	-
SaBi34568	-
SaBi36110	biogenesis of lysosome-related organelles complex 1 subunit
SaBi36181	SpoU rRNA Methylase family
SaBi06059	Sodium hydrogen exchanger
SaBi17514	strubbelig-receptor family
SaBi07739	Domain in histone families 1 and 5
SaBi39714	strubbelig-receptor family
SaBi14037	Protein RCC2 homolog
SaBi37271	Proteinaceous RNase P 1, chloroplastic
SaBi17139	Belongs to the small heat shock protein (HSP20) family
SaBi34249	Belongs to the histidine acid phosphatase family
SaBi06095	-
SaBi33702	Family of unknown function (DUF716)
SaBi22519	Protein-ribulosamine 3-kinase
SaBi24827	Catalytic subunit of the molybdopterin synthase complex, a complex that catalyzes the conversion of precursor Z into molybdopterin. Acts by mediating the incorporation of 2 sulfur atoms from thiocarboxylated MOCS2A into precursor Z to generate a dithiolene group
SaBi24313	May be involved in both secretory and endocytic intracellular trafficking in the endosomal prevacuolar compartments
SaBi20560	Outer envelope pore protein 16-3, chloroplastic
SaBi15661	Protease Do-like 1 chloroplastic
SaBi09912	)-oxidoreductase
SaBi37801	Transmembrane protein 53-like
SaBi16264	serine threonine-protein phosphatase
SaBi21213	-
SaBi36882	Guanylylate cyclase
SaBi34087	-
SaBi16138	calcineurin b-like protein
SaBi02559	PI-PLC X-box domain-containing protein
SaBi06364	Belongs to the NPH3 family
SaBi36156	-
SaBi31187	-
SaBi06225	-
SaBi04190	Heat shock protein
SaBi24570
SaBi38925
SaBi07647	-
SaBi11505	RNA recognition
SaBi12452	Plastid division protein CDP1
SaBi35706	B12D protein
SaBi13988	Pollen-specific protein
SaBi39003	Protein LHCP TRANSLOCATION
SaBi20755	Photosystem I reaction center subunit V
SaBi20803	Phd finger protein
SaBi17540	26S proteasome non-ATPase regulatory subunit
SaBi38978	Uncharacterised protein family UPF0052
SaBi35961	Biotin carboxyl carrier protein of acetyl-CoA carboxylase
SaBi36143	Uncharacterized protein family, UPF0114
SaBi27945	Belongs to the disease resistance NB-LRR family
SaBi14872	Tyrosyl-tRNA synthetase
SaBi26719	Arm repeat protein interacting with
SaBi40707	Belongs to the formin-like family
SaBi26960	ATP-dependent Clp protease proteolytic subunit
SaBi19312	Protein ROOT PRIMORDIUM DEFECTIVE
SaBi00323	Ras-related protein
SaBi17882	protein At5g03900, chloroplastic-like
SaBi01890	Calcineurin subunit
SaBi03407	Protein trichome birefringence-like 5
SaBi07694	-
SaBi30455	Vesicle-associated protein
SaBi20907	cellular component assembly
SaBi20253	-
SaBi35831	Sedoheptulose-1,7-bisphosphatase
SaBi07756	Belongs to the beta-ketoacyl-ACP synthases family
SaBi35171	PsbP-like protein 2
SaBi27489	auxin-induced protein
SaBi31881	Vesicle-associated protein
SaBi11618	Catalyzes the radical-mediated insertion of two sulfur atoms into the C-6 and C-8 positions of the octanoyl moiety bound to the lipoyl domains of lipoate-dependent enzymes, thereby converting the octanoylated domains into lipoylated derivatives
SaBi29920	serine protease inhibitor, Kazal-type family protein
SaBi39197
SaBi11117	transposition, RNA-mediated
SaBi35257	Uncharacterized conserved protein (DUF2075)
SaBi35458	ABC transporter G family member
SaBi32048	Aldo-keto reductase family 4 member
SaBi23456	DNA-binding protein
SaBi35601	Helicase and polymerase-containing protein
SaBi13156	NADH dehydrogenase ubiquinone 1 alpha subcomplex subunit
SaBi16481	mediator of RNA polymerase II transcription subunit
SaBi00592	sulfhydryl oxidase
SaBi12742	hydrolase
SaBi42608	dual specificity protein
SaBi16722	Mitochondrial ubiquitin ligase activator of NFKB
SaBi15573	Protein of unknown function (DUF3082)
SaBi39468	IQ-domain
SaBi23731	-
SaBi06154	Belongs to the mitochondrial carrier (TC 2.A.29) family
SaBi25112	psbP domain-containing protein 2
SaBi11713
SaBi01511
SaBi00379	isoform X1
SaBi31525	Pentatricopeptide repeat-containing protein
SaBi32054	Protein of unknown function (DUF3675)
SaBi34175	Potassium channel
SaBi20465	RIBOSOMAL protein
SaBi12380	Geranylgeranyl diphosphate reductase
SaBi36483	Belongs to the peroxidase family
SaBi20542	Omega-6 fatty acid desaturase, endoplasmic reticulum isozyme
SaBi30614	Glutaredoxin
SaBi12719	A G-specific adenine DNA
SaBi24739	Peptide chain release factor
SaBi25675	Belongs to the GroES chaperonin family
SaBi38981	Conserved hypothetical protein (Lin0512_fam)
SaBi26828	Peroxisome biogenesis protein
SaBi41896	Probably involved in membrane trafficking
SaBi02545	eukaryotic translation initiation factor
SaBi05431	Belongs to the class-I aminoacyl-tRNA synthetase family
SaBi10709	serine threonine-protein kinase
SaBi07589	Sucrose transport protein
SaBi12066	Photosystem II reaction center W protein
SaBi27014	isoform X1
SaBi28739	domain-containing protein
SaBi30513	Plant pleckstrin homology-like region
SaBi34490	-
SaBi27648	growth-regulating factor
SaBi03238	3-hydroxyisobutyrate dehydrogenase-like 1 mitochondrial
SaBi34681	Histidine kinase
SaBi27158	Clp protease-related protein At4g12060
SaBi00878	Biotin carboxylase
SaBi02124	belongs to the protein kinase superfamily
SaBi13317	Uracil phosphoribosyltransferase
SaBi00756	histone chaperone ASF1A
SaBi40675	CLAVATA3 ESR (CLE)-related protein
SaBi32037	Rhodanese Cell cycle control phosphatase superfamily protein
SaBi34525	The light-harvesting complex (LHC) functions as a light receptor, it captures and delivers excitation energy to photosystems with which it is closely associated
SaBi32573	-
SaBi25911	Photosystem I reaction center subunit XI
SaBi13903	Belongs to the GroES chaperonin family
SaBi18026
SaBi14711	Nuclear transcription factor Y subunit
SaBi14421	-
SaBi01870	Catalytic subunit of the peripheral V1 complex of vacuolar ATPase (V-ATPase). V-ATPase is responsible for acidifying a variety of intracellular compartments in eukaryotic cells
SaBi17610	Belongs to the universal ribosomal protein uS13 family
SaBi28004	May be involved in modulation of pathogen defense and leaf cell death
SaBi00236	transcription factor
SaBi06343	Condensin II non structural maintenance of chromosomes subunit
SaBi23736	Catalyzes the conversion of hemimercaptal, formed from methylglyoxal and glutathione, to S-lactoylglutathione
SaBi40369	F-box kelch-repeat protein
SaBi00464	RING-H2 finger protein
SaBi41804	L-ascorbate oxidase homolog
SaBi25351	Enoyl- acyl-carrier-protein reductase NADH
SaBi24274	Ribose-5-phosphate isomerase
SaBi17120	Porphobilinogen deaminase
SaBi02734	F-Box protein
SaBi02734	Histone H3
SaBi38989	Belongs to the cytochrome P450 family
SaBi07082	fasciclin-like arabinogalactan protein
SaBi13139	Polyketide cyclase / dehydrase and lipid transport
SaBi15934	Dynein light chain
SaBi11066	Glyoxylate succinic semialdehyde reductase 2
SaBi07885	Belongs to the glyceraldehyde-3-phosphate dehydrogenase family
SaBi02157	Belongs to the cyclin family
SaBi13487	mitochondrial chaperone
SaBi00341	Ferredoxins are iron-sulfur proteins that transfer electrons in a wide variety of metabolic reactions
SaBi11268	ahl1,atahl1
SaBi05766	hydrolase
SaBi13991	beta-D-xylosidase 7
SaBi00581	The light-harvesting complex (LHC) functions as a light receptor, it captures and delivers excitation energy to photosystems with which it is closely associated
SaBi14466	Protein STAY-GREEN LIKE
SaBi34957	SufE-like protein
SaBi27184	Carboxylesterase
SaBi01990	Histone H2B
SaBi11050	Belongs to the GMC oxidoreductase family
SaBi16748	rRNA-processing protein
SaBi01986	D-glycerate 3-kinase
SaBi11042	-
SaBi01829	Belongs to the 'GDSL' lipolytic enzyme family
SaBi40314	At4g14100-like
SaBi17641	Belongs to the protein kinase superfamily
SaBi19861	carrier protein transacylase
SaBi13550	Acetyltransferase (GNAT) family
SaBi17292	Protein TIC 62, chloroplastic
SaBi05873	Belongs to the universal ribosomal protein uL15 family
SaBi06224	thiamine biosynthetic bifunctional enzyme
SaBi25288	oxygen-evolving enhancer protein
SaBi23921	acyl-activating enzyme
SaBi09980	-
SaBi16474	DNA gyrase subunit A
SaBi33578	Domain of unknown function (DUF4228)
SaBi10353	Belongs to the peptidase C1 family
SaBi11314	growth-regulating factor
SaBi00542	Glutaredoxin-C4
SaBi15563	30S ribosomal protein S20
SaBi42866	hydrolase C777.06c
SaBi16985	CDPK adapter protein
SaBi05112	ELMO domain-containing protein
SaBi17192	transposition, RNA-mediated
SaBi31695	DUF761-associated sequence motif
SaBi40826	Single-stranded DNA-binding protein WHY1
SaBi24337	Rubredoxin
SaBi27557	cellular response to sulfur starvation
SaBi24839	DNA polymerase delta subunit
SaBi16208	serine threonine-protein kinase
SaBi08401	Kinetochore protein Nuf2
SaBi20826	GDT1-like protein 2
SaBi10883	KH domain-containing protein
SaBi24485	E3 ubiquitin-protein ligase
SaBi13513	3-ketoacyl-coa synthase
SaBi06131	ABC transporter I family member 10
SaBi39511	Triose phosphate phosphate translocator
SaBi18085
SaBi00898	Belongs to the protein kinase superfamily. Ser Thr protein kinase family
SaBi02218	O-acyltransferase (WSD1-like)
SaBi17071	Photosystem I reaction center subunit IV
SaBi14153	Belongs to the bacterial ribosomal protein bL31 family
SaBi20288	Haloacid dehalogenase-like hydrolase domain-containing protein
SaBi02595	Belongs to the D-isomer specific 2-hydroxyacid dehydrogenase family
SaBi39232	deSI-like protein
SaBi34379	-
SaBi33981	(DL)-glycerol-3-phosphatase
SaBi06820	Protein preY, mitochondrial
SaBi13913	Transcription initiation factor TFIID subunit
SaBi25607	aminotransferase
SaBi35451	-
SaBi24450	Belongs to the major facilitator superfamily. Sugar transporter (TC 2.A.1.1) family
SaBi00739	V-type proton ATPase subunit
SaBi21124	Domain of unknown function (DUF3511)
SaBi00164	-
SaBi21371	Ribulose-1,5 bisphosphate carboxylase oxygenase large subunit N-methyltransferase
SaBi16066	gpi-anchored protein
SaBi12408
SaBi34841	The light-harvesting complex (LHC) functions as a light receptor, it captures and delivers excitation energy to photosystems with which it is closely associated
SaBi40136	Arabidopsis protein of unknown function
SaBi30971	Protein of unknown function (DUF2499)
SaBi13351	C-terminal binding protein
SaBi35757	Ribulose bisphosphate carboxylase oxygenase activase
SaBi25217	Belongs to the hexokinase family
SaBi25339	Photosystem II 5 kDa protein
SaBi01074	Belongs to the universal ribosomal protein uS5 family
SaBi10194	50S ribosomal protein 6
SaBi10815	Nucleoside diphosphate kinase
SaBi15645	Glutaredoxin
SaBi00699	PPIases accelerate the folding of proteins. It catalyzes the cis-trans isomerization of proline imidic peptide bonds in oligopeptides
SaBi15940	zinc finger protein
SaBi07630	Cytochrome b6f complex subunit
SaBi40571	Quinone oxidoreductase-like protein
SaBi00055	kinase activator-like
SaBi39277	Serine incorporator
SaBi00354	Belongs to the small GTPase superfamily. Rho family
SaBi30276	The H protein shuttles the methylamine group of glycine from the P protein to the T protein
SaBi31456	1-deoxy-D-xylulose-5-phosphate synthase
SaBi32789	Vacuolar protein sorting-associated protein
SaBi24465	Belongs to the 'GDSL' lipolytic enzyme family
SaBi17816	2-cys peroxiredoxin BAS1
SaBi24769	Photosystem I reaction centre subunit IV / PsaE
SaBi15087	Plays an essential role in chain termination during de novo fatty acid synthesis
SaBi19194	-
SaBi20497	Dirigent proteins impart stereoselectivity on the phenoxy radical-coupling reaction, yielding optically active lignans from two molecules of coniferyl alcohol in the biosynthesis of lignans, flavonolignans, and alkaloids and thus plays a central role in plant secondary metabolism
SaBi35622	Zinc finger (C3HC4-type RING finger) family protein BRCT domain-containing protein
SaBi12182	BRCT domain-containing protein
SaBi13127	UDP-glucuronate 4-epimerase
SaBi06135	Photosystem I reaction center subunit
SaBi20387	50S ribosomal protein 5
SaBi09986	Belongs to the peptidase A1 family
SaBi39361	Cysteine-rich receptor-like protein kinase
SaBi18110	hemK methyltransferase family member
SaBi34988	heavy metal transport detoxification superfamily protein
SaBi12069	Belongs to the class-I pyridine nucleotide-disulfide oxidoreductase family
SaBi33542	WD repeat-containing protein
SaBi15813	UPF0136 membrane protein At2g26240-like
SaBi13347	50S ribosomal protein L5
SaBi12657	Belongs to the class-III pyridoxal-phosphate-dependent aminotransferase family
SaBi39471	Involved in chlorophyll biosynthesis. Catalyzes the insertion of magnesium ion into protoporphyrin IX to yield Mg- protoporphyrin IX
SaBi29530	alpha-L-fucosidase 1-like
SaBi06365	ribonuclease III family protein
SaBi27888	Boron transporter
SaBi31962	Hydroxyproline-rich glycoprotein family protein
SaBi13238	-
SaBi30251	Belongs to the mitochondrial carrier (TC 2.A.29) family
SaBi30845	-
SaBi36295	The light-harvesting complex (LHC) functions as a light receptor, it captures and delivers excitation energy to photosystems with which it is closely associated
SaBi00841	NADH dehydrogenase ubiquinone 1 alpha subcomplex assembly factor
SaBi00025	Protein FAR1-RELATED SEQUENCE 5-like
SaBi26636
SaBi34338	two-component response regulator
SaBi15982	Stem-specific protein
SaBi37662
SaBi05963	Armadillo beta-catenin repeat family protein
SaBi06772	-
SaBi31218	Belongs to the UDP-glycosyltransferase family
SaBi24878	Phosphoglycolate phosphatase
SaBi43007	-
SaBi32070	Peptidyl-prolyl cis-trans isomerase
SaBi25323	Dicarboxylate transporter 1
SaBi20579	transcription factor
SaBi09120
SaBi15881	-
SaBi22868	L-gulonolactone oxidase activity
SaBi11872	-
SaBi17148	domain-containing protein
SaBi40218	Belongs to the RNase T2 family
SaBi10834	Protein of unknown function, DUF547
SaBi35635	deSI-like protein
SaBi06940	cysteine
SaBi23102
SaBi32013	PPIases accelerate the folding of proteins. It catalyzes the cis-trans isomerization of proline imidic peptide bonds in oligopeptides
SaBi40727	serine threonine-protein kinase
SaBi37986
SaBi11967	Inactive leucine-rich repeat receptor-like protein kinase
SaBi27160	Protein trichome birefringence-like 18
SaBi24323	Uncharacterized conserved protein (DUF2358)
SaBi05994	Double-stranded RNA-binding protein
SaBi41777	dof zinc finger protein
SaBi01402	Belongs to the glyceraldehyde-3-phosphate dehydrogenase family
SaBi40555	Belongs to the glycosyl hydrolase 28 family
SaBi16854	Photosystem II reaction center psb28 protein
SaBi13104	axial regulator YABBY
SaBi03199	Transmembrane protein 234 homolog
SaBi07535	-
SaBi34505	Signal recognition particle 43 kDa protein
SaBi39223	Pentatricopeptide repeat-containing protein
SaBi42850	Dynein light chain
SaBi27429	Transcription factor Pcc1
SaBi00137	Hydrophobic protein
SaBi05722	Methylketone synthase
SaBi20961	glycosyltransferase
SaBi01555	RING-H2 finger protein
SaBi27207	glycerol-3-phosphate transporter
SaBi20908	ethylene-responsive transcription factor
SaBi18838	Domain of unknown function (DUF3783)
SaBi01810	Dicarboxylate transporter
SaBi35209	Belongs to the protein kinase superfamily. Ser Thr protein kinase family
SaBi10738	asparagine--tRNA ligase, cytoplasmic
SaBi25346	cinnamoyl-CoA reductase 1-like
SaBi21372	-
SaBi30431	Protein of unknown function, DUF538
SaBi13963	lysine-specific demethylase
SaBi08123	-
SaBi08750
SaBi07681	belongs to the protein kinase superfamily
SaBi16919	Belongs to the glycosyltransferase 8 family
SaBi01102	E3 ubiquitin-protein ligase
SaBi06947	serine threonine-protein kinase
SaBi02296	Inorganic pyrophosphatase
SaBi35861	30S ribosomal protein S31
SaBi35266	Ferric reduction oxidase 7
SaBi17235	Thylakoid soluble phosphoprotein TSP9
SaBi31358	late embryogenesis abundant protein
SaBi24788	calcium-dependent protein kinase
SaBi34232	Converts alpha-aldose to the beta-anomer
SaBi42881	Xylose isomerase
SaBi31974	Belongs to the multi antimicrobial extrusion (MATE) (TC 2.A.66.1) family
SaBi06268	AP2 ERF and B3 domain-containing transcription
SaBi20994	Zinc-finger homeodomain protein
SaBi04869	O-acyltransferase (WSD1-like)
SaBi17557	transcription repressor
SaBi04972	Belongs to the universal ribosomal protein uS8 family
SaBi06250	S-adenosyl-L-methionine carboxyl methyltransferase family protein
SaBi40746	Protein NRT1 PTR FAMILY
SaBi17278	-
SaBi35981	transcription factor
SaBi13593	Catalyzes the sequential NAD-dependent oxidations of L- histidinol to L-histidinaldehyde and then to L-histidine
SaBi02663	Auxin-induced protein 6B-like
SaBi09098	Tetraketide alpha-pyrone reductase 2-like
SaBi15476	-
SaBi07263	MKS1-like
SaBi40683	WD domain, G-beta repeat
SaBi06455	Remorin, C-terminal region
SaBi09612
SaBi01688	Transcription factor
SaBi17726	Plant non-specific lipid-transfer proteins transfer phospholipids as well as galactolipids across membranes. May play a role in wax or cutin deposition in the cell walls of expanding epidermal cells and certain secretory tissues
SaBi22662	Belongs to the small heat shock protein (HSP20) family
SaBi27199	Monocopper oxidase-like protein
SaBi02514	Belongs to the MIP aquaporin (TC 1.A.8) family
SaBi35380	Belongs to the peptidase S10 family
SaBi11148	Belongs to the glutamyl-tRNA reductase family
SaBi34311	Blue copper
SaBi16760	Mediates both low-affinity uptake and efflux of sugar across the membrane
SaBi26870	fasciclin-like arabinogalactan protein
SaBi32617	Domain of unknown function (DUF3598)
SaBi02746	radialis-like
SaBi07388	3-ketoacyl-CoA synthase
SaBi07992	mechanosensitive ion channel
SaBi27028	Remorin-like
SaBi03796	Heavy-metal-associated domain
SaBi40433	Belongs to the short-chain dehydrogenases reductases (SDR) family
SaBi27537	L-type lectin-domain containing receptor kinase
SaBi06206	Belongs to the glycosyl hydrolase 1 family
SaBi14199
SaBi03928	Squamosa promoter-binding-like protein
SaBi13043	Transcription factor that specifically binds AT-rich DNA sequences related to the nuclear matrix attachment regions (MARs)
SaBi39678
SaBi16776	Monothiol
SaBi35785	BEL1-like homeodomain protein
SaBi08226	isoform X1
SaBi06384
SaBi23258
SaBi39045	-
SaBi29663	Belongs to the peptidase S10 family
SaBi30295	Type I inositol 1,4,5-trisphosphate 5-phosphatase
SaBi00113	Auxin responsive protein
SaBi05800	Catalyzes the aldol cleavage of 4-hydroxy-4-methyl-2- oxoglutarate (HMG) into 2 molecules of pyruvate. Also contains a secondary oxaloacetate (OAA) decarboxylase activity due to the common pyruvate enolate transition state formed following C-C bond cleavage in the retro-aldol and decarboxylation reactions
SaBi02573	Belongs to the CTL (choline transporter-like) family
SaBi03861
SaBi15942	The light-harvesting complex (LHC) functions as a light receptor, it captures and delivers excitation energy to photosystems with which it is closely associated
SaBi37372	Belongs to the NPH3 family
SaBi13388	Belongs to the 'GDSL' lipolytic enzyme family
SaBi15704	Mediates both low-affinity uptake and efflux of sugar across the membrane
SaBi00583	Gibberellin-regulated protein
SaBi29320
SaBi00403	Glycosyl transferase family 21
SaBi00568
SaBi12782	dCTP pyrophosphatase 1-like
SaBi35830	Ferredoxins are iron-sulfur proteins that transfer electrons in a wide variety of metabolic reactions
SaBi08073	Gibberellin-regulated protein
SaBi36100	Belongs to the 'GDSL' lipolytic enzyme family
SaBi01127	CBS domain-containing protein
SaBi11212	pectinesterase
SaBi15929	Wound induced protein
SaBi09288	ureide permease
SaBi21358	Destroys radicals which are normally produced within the cells and which are toxic to biological systems
SaBi15572	-
SaBi13664
SaBi34736	cytochrome P450
SaBi01923	guanine nucleotide exchange factor
SaBi13773	lipid-binding protein At4g00165
SaBi11231	Belongs to the terpene synthase family
SaBi07042	Protodermal factor
SaBi39671	Belongs to the class I-like SAM-binding methyltransferase superfamily. Cation-independent O- methyltransferase family
SaBi42822	SPX domain-containing protein
SaBi34276	Type I inositol 1,4,5-trisphosphate 5-phosphatase CVP2-like
SaBi17728	Plant non-specific lipid-transfer proteins transfer phospholipids as well as galactolipids across membranes. May play a role in wax or cutin deposition in the cell walls of expanding epidermal cells and certain secretory tissues
SaBi11317	Belongs to the ABC transporter superfamily. ABCG family. PDR (TC 3.A.1.205) subfamily
SaBi22777	Zinc finger protein
SaBi02763	Mitochondrial transcription termination factor family protein
SaBi32662	Belongs to the cytochrome P450 family
SaBi30873	Catalyzes xyloglucan endohydrolysis (XEH) and or endotransglycosylation (XET). Cleaves and religates xyloglucan polymers, an essential constituent of the primary cell wall, and thereby participates in cell wall construction of growing tissues
SaBi20868	ammonium transporter
SaBi35802	UDP-Glycosyltransferase
SaBi09143	dodecanoyl-[acyl-carrier-protein] hydrolase activity
SaBi00300	-
SaBi07464	Belongs to the 'GDSL' lipolytic enzyme family
SaBi18961	Belongs to the oxygen-dependent FAD-linked oxidoreductase family
SaBi37901	Equilibrative nucleotide transporter 3-like
SaBi12812	Lignin degradation and detoxification of lignin-derived products
SaBi41068	Octicosapeptide Phox Bem1p (PB1) domain-containing protein
SaBi36180	DNA-damage-repair toleration protein
SaBi24883	Belongs to the protein kinase superfamily. Ser Thr protein kinase family
SaBi37001	14 kDa proline-rich protein
SaBi02562	glycine-rich protein
SaBi10640
SaBi25039	-
SaBi17619	-
SaBi37520
SaBi38050	cytochrome P450
SaBi41188	OTU domain-containing protein
SaBi24405	FRIGIDA-like protein
SaBi09258	PI-PLC X domain-containing protein
SaBi17220	Ribosomal protein P0 is the functional equivalent of E.coli protein L10
SaBi08603	Lysosomal beta
SaBi14032	Belongs to the cytochrome P450 family
SaBi03247	-
SaBi07900	Belongs to the sterol desaturase family
SaBi02662	Auxin-induced protein 6B-like
SaBi41425	YLS2-like
SaBi27363	Transcription factor
SaBi17503	Protein ALTERED XYLOGLUCAN 4-like
SaBi12910	Alpha-L-arabinofuranosidase
SaBi38702	CRIB domain-containing protein
SaBi35394
SaBi00737	Belongs to the iron ascorbate-dependent oxidoreductase family
SaBi17732	Plant non-specific lipid-transfer proteins transfer phospholipids as well as galactolipids across membranes. May play a role in wax or cutin deposition in the cell walls of expanding epidermal cells and certain secretory tissues
SaBi07813	Gibberellin-regulated protein
SaBi41272
SaBi38856	auxin-responsive protein
SaBi17598	growth-regulating factor
SaBi03958	gag-polypeptide of LTR copia-type

## Sheet:  Supplementary Table 8
Supplementary Table 8. Length and average length of homologous chromosomes in four dipoild Salicornia species (bp).
	S. europaea (Israel)	S. persica ssp. iranica	S. sinus-persica	S. brachiata	Average length
Chr1	62927300	63129870	63422998	61017307	6.26244e+07
Chr2	63346200	63699214	63812272	59435009	6.25732e+07
Chr3	59485227	69727102	60504182	55846030	6.13906e+07
Chr4	58487419	58484898	58306074	56083196	5.78404e+07
Chr5	56823638	56944142	57506789	55995678	5.68176e+07
Chr6	55346071	55522884	55981153	53382377	5.50581e+07
Chr7	52267662	52555461	54845491	50755066	52605920
Chr8	53231173	43396508	51937722	50797862	4.98408e+07
Chr9	51428091	52140989	51528675	49949492	5.12618e+07
